1 **SCF<sup>FBXW7</sup> regulates G2-M progression through control of CCNL1**  
2 **ubiquitination.**

3  
4 Siobhan O'Brien<sup>1,5</sup>, Susan Kelso<sup>2,3</sup>, Zachary Steinhart<sup>4,6</sup>, Stephen Orlicky<sup>3</sup>, Monika Mis<sup>4,7</sup>,  
5 Yunhye Kim<sup>4</sup>, Sichun Lin<sup>4</sup>, Frank Sicheri<sup>1,2,3</sup>, Stephane Angers<sup>1,4,5</sup>

6  
7 1- Department of Biochemistry, University of Toronto, Toronto, Canada

8 2- Department of Molecular Genetics, University of Toronto, Toronto, Canada, M5G 1X5

9 3 -Lunenfeld-Tanenbaum Research Institute, Sinai Health System, Toronto, Canada, M5G 1X5

10 4- Leslie Dan Faculty of Pharmacy, University of Toronto, Toronto, Canada M5S 3M2

11 5- Donnelly Centre for Cellular and Biomolecular Research, Toronto, Canada, M5S 3E1

12 6- Present Address: Gladstone Institute, University of California San Francisco, San Francisco,  
13 USA, 94158

14 7- Present Address: Genentech, South San Francisco, USA, 49080

15

16 Correspondence to Stephane Angers: [stephane.angers@utoronto.ca](mailto:stephane.angers@utoronto.ca)

17

18 Running Title: FBXW7 controls G2-M through CCNL1

19 Keywords: FBXW7, cell cycle, cyclin L1, mitosis, CDK11

20

21

22

23

24

25

26

27

28

29

30

31

32

33

34

35

36

37

38

39

40

41

42

43

44

## 45 **Abstract**

46 *FBXW7*, which encodes a substrate specific receptor of an SCF E3 ligase complex, is a  
47 frequently mutated human tumor suppressor gene known to regulate the post-translational  
48 stability of various proteins involved in cellular proliferation. Here, using genome-wide CRISPR  
49 screens we report a novel synthetic lethal genetic interaction between *FBXW7* and *CCNL1* and  
50 describe *CCNL1* as a new substrate of the SCF-*FBXW7* E3 ligase. Further analysis showed  
51 that the *CCNL1*-CDK11 complex is critical at the G2-M phase of the cell cycle since defective  
52 *CCNL1* accumulation, resulting from *FBXW7* mutation, leads to shorter mitotic time. Cells  
53 harboring *FBXW7* loss-of-function mutations are hypersensitive to treatment with a CDK11  
54 inhibitor, highlighting a genetic vulnerability that could be leveraged for cancer treatment.

## 56 **Introduction**

57 F-box and WD repeat domain containing protein 7 (*FBXW7*) is a substrate specific recognition  
58 module of a Skp1-Cul1-Fbox (SCF) E3 ligase complex named SCF<sup>*FBXW7*</sup> (Welcker and Clurman,  
59 2008). SCF E3 ligases target several proto-oncogenes for ubiquitin-dependent proteasomal  
60 degradation to regulate cell cycle progression and proliferation (Koepp, 2001; Reed et al., 2004;  
61 Wei et al., 2005; Welcker et al., 2004b; Yeh et al., 2018). One of the better characterized  
62 substrates of SCF<sup>*FBXW7*</sup> is cyclin E, a master regulator of the G1-S cell cycle phase transition  
63 (Koepp, 2001; Ohtsubo et al., 1995). Loss of *FBXW7* and concomitant accumulation of cyclin E  
64 deregulates the cell cycle (Reed et al., 2004), enhances DNA replication (Minella et al., 2008),  
65 and causes genomic instability across many different cell types (Loeb et al., 2005; Minella et al.,  
66 2007; Rajagopalan et al., 2004; Spruck et al., 1999). c-MYC is another well-studied substrate of  
67 SCF<sup>*FBXW7*</sup> (Welcker et al., 2004a, 2004b). Although not directly implicated in regulation of cell-  
68 cycle phase transition, c-MYC inhibits many inhibitors of the cell cycle including p21 and p27  
69 which negatively regulate the G1-S transition checkpoint (Mateyak et al., 1999; Perez-Roger et  
70 al., 1999).

71  
72 Given its fundamental roles in cell cycle control, *FBXW7* inactivating mutations that lead to  
73 substrate stabilization are common across a wide-range of cancers, with highest mutational  
74 frequency in uterine, cervical and intestinal cancers (Yeh et al., 2018). The most common  
75 mutations are within *FBXW7* exons encoding WD-repeats, which function as the substrate-  
76 recognition domain. These mutations lead to defective post-translational control of proto-  
77 oncogene abundance and hence promote cancer progression. Biochemical studies have  
78 confirmed that the WD-repeat hotspot mutations (R465C/H/L, R479P/Q/\*, and R505C/G/H) are  
79 loss of function mutations that disrupt substrate binding (Orlicky et al., 2003; Tang et al., 2007).  
80 In addition to cyclin E and c-Myc, SCF<sup>*FBXW7*</sup> has also been implicated in the control of other  
81 potentially oncogenic substrates, including c-Jun (Nateri et al., 2004; Wei et al., 2005), and  
82 Notch1 (Gupta-Rossi et al., 2001; Oberg et al., 2001; O'Neil et al., 2007; Tetzlaff et al., 2004).

83  
84 Currently categorized as a transcriptional or non-canonical cyclin, *CCNL1* (cyclin L1) was  
85 demonstrated to functionally regulate the spliceosome, along with its serine/threonine kinase  
86 partner cyclin-dependent kinase 11 (CDK11) (Chen et al., 2007, 2006; Loyer and Trembley,  
87 2020). Consistent with the understanding of cyclin-CDK biology, the primary role of *CCNL1* is to  
88 promote CDK11 activity (Loyer and Trembley, 2020). *CCNL1* has been proposed as a

89 candidate oncogene in head and neck cancer due to high levels of chromosomal amplification  
90 that correlates with poor overall survival in patients (Muller et al., 2006; Redon et al., 2002;  
91 Sticht et al., 2005). Amplification of *CCNL1* is also associated with poor prognosis in uterine  
92 cancer (Mitra et al., 2010). CDK11 has several isoforms, with the p58 version generated via  
93 usage of an internal ribosomal entry site within CDK11 mRNA transcripts at the G2/M cell cycle  
94 transition (Cornelis et al., 2000). Recently, the CCNL1-CDK11 complex has been implicated in  
95 cytokinesis, with CDK11-p58 kinase activity required for abscission, the final stage of mitosis  
96 (Renshaw et al., 2019). Despite a poor understanding of the role of CCNL1 in cancer initiation  
97 and progression, several studies have established CDK11 as an important regulator of cancer  
98 cell proliferation and that its loss of function is lethal in many cancer types (Ahmed et al., 2019;  
99 Liu et al., 2016). A novel selective CDK11 inhibitor, OTS964, was recently serendipitously  
100 identified (Lin et al., 2019) and offers a potentially tractable therapeutic opportunity for cancers,  
101 perhaps in contexts where tumor cells are reliant on CDK11 activity.

102  
103 In the present study, we combine drug selection with gene-editing of pancreatic cancer cells to  
104 rewire their growth dependency in such a way to be exquisitely reliant on the loss of FBXW7  
105 activity. This engineered model was required to ensure that cell growth was dependent on this  
106 single *FBXW7* mutation in order to hone in the molecular mechanisms underlying this frequent  
107 cancer causing alteration. Using genome-wide CRISPR fitness screens performed in isogenic  
108 cell lines, we uncovered a novel synthetic lethal interaction between *FBXW7* and *CCNL1*. Given  
109 that SCF<sup>FBXW7</sup> is known to control the levels of other cyclins, we showed that CCNL1 is a novel  
110 substrate for this E3 ligase. Our findings suggest that the deregulation of this axis is frequent in  
111 human cancers and it culminates in the hyperactivation of CCNL1's kinase partner CDK11,  
112 thereby uncovering a novel therapeutic opportunity.

113

114

## 115 **Results**

116

### 117 **Loss of *FBXW7* induces resistance to Wnt-inhibition in a Wnt-addicted cell line**

118 A subset of pancreatic adenocarcinoma harbor inactivating mutations within *RNF43*, a negative  
119 regulator of the Wnt- $\beta$ catenin pathway (Jiang et al., 2013). As a result of *RNF43* mutation cells  
120 express high levels of Frizzled receptors and are exquisitely dependent on autocrine Wnt-  
121  $\beta$ catenin signaling for growth as highlighted by their hypersensitivity to LGK974, a small  
122 molecule inhibitor of porcupine (PORCN) that blocks secretion and function of Wnt proteins  
123 (**Figure 1A,B**), as well as to anti-Frizzled blocking antibodies (Steinhart et al., 2017). To pre-  
124 emptively study mechanisms of resistance to Wnt inhibitors, we conducted a genome-wide  
125 CRISPR suppressor screen, in the *RNF43* mutant cell line HPAF-II. This experiment identified  
126 gene knockouts that overcome the growth arrest phenotype induced by LGK974 (**Figure 1C,D**).  
127 Predictably, the screen identified the well-known negative regulators of  $\beta$ catenin signaling,  
128 *AXIN1*, *APC*, and *CSNK1A1* (**Figure 1D**) as these mutations all lead to ligand-independent  
129  $\beta$ catenin stabilization and regulation of gene expression and hence bypass the requirement for  
130 autocrine Wnt ligands (Amit et al., 2002; Liu et al., 2002; Steinhart et al., 2017; Su et al., 2008).  
131 The genes above represented nearly 20% of the total amount of next generation sequencing  
132 reads in the suppressor screen highlighting their strong negative regulatory functions during

133 Wnt-  $\beta$ catenin signaling. In addition to these genes, the screen also uncovered tumor  
134 suppressor F-box protein *FBXW7*, which functions as a substrate recognition subunit within a  
135 Skp1-Cullin-Fbox (SCF) E3 ligase complex and is a well-studied tumor suppressor gene (Mao  
136 et al., 2004; Yeh et al., 2018). *APC* and *FBXW7* HPAF-II knockout cells were generated using  
137 CRISPR and selected using selective pressure with LGK974 (**Figure 1E, EV1A,B**). Strikingly,  
138 whereas *FBXW7* knockout cells were confirmed to be resistant to LGK974-mediated cell cycle  
139 arrest (**Figure 1F**), with relative confluence reduced to 9.1% in the wild-type, 28% in *FBXW7*<sup>-/-</sup>  
140 and unchanged in *APC*<sup>-/-</sup> in the presence of LGK974 (**Figure 1F**), only *APC*<sup>-/-</sup> cells maintained  
141 high  $\beta$ catenin levels in the presence of LGK974 (**Figure 1G**). This data confirms that in HPAF-II  
142 cells, *FBXW7* itself is not regulating  $\beta$ catenin levels as was reported in a different context (Jiang  
143 et al., 2016). We conclude that *FBXW7*<sup>-/-</sup> cells are partially resistant to *PORCN* inhibitor-  
144 mediated growth arrest by a mechanism that does not involve reactivation of downstream  
145  $\beta$ catenin signaling.

146

#### 147 **CCNL1 loss-of-function is synthetic lethal with *FBXW7* mutation.**

148 To reveal the growth mechanisms dysregulated in *FBXW7*<sup>-/-</sup> cells that underlie the resistance to  
149 LGK974 treatment, we performed isogenic CRISPR fitness screens in wild-type and *FBXW7*<sup>-/-</sup>  
150 HPAF-II cells (**Figure 2A**). We then used the BAGEL algorithm to calculate a Bayes factor (BF)  
151 for each gene (Hart and Moffat, 2016). BF is a confidence score that knockout of a specific gene  
152 causes a decrease in fitness where high BF indicates increased confidence that the knockout of  
153 the gene results in a decrease in fitness. We then derived a differential fitness score for each  
154 gene by subtracting the BF scores obtained in *FBXW7*<sup>-/-</sup> and wild-type cells and plotted the  
155 differential Z-score (**Figure 2B, EV1C,D**). Confirming that *FBXW7*<sup>-/-</sup> cells have evaded a  
156 requirement for Wnt- $\beta$ catenin signaling, several of the genes we previously identified as fitness  
157 genes in HPAF-II cells (*FZD5*, *PORCN*, *TCF7L2*, *WLS*, *CTNNB1*) (Steinhart et al., 2017) have  
158 negative Z-scores, indicating a greater fitness defect observed in wild-type cells. Interestingly,  
159 the gene with the highest positive differential Z-score was the poorly characterized cyclin family  
160 member cyclin L1 (*CCNL1*) (**Figure 2B** and individual *CCNL1* gRNA dropouts comparison in  
161 **Figure 2C**). To validate these results, we performed multicolor cell competition assays with  
162 HPAF-II or HPAF-II *FBXW7*<sup>-/-</sup> mutant cells expressing a control gRNA targeting *AAVS1* (labeled  
163 with mCherry) or two independent gRNAs targeting *CCNL1* (labeled with GFP) and showed that  
164 mCherry cells outcompeted GFP cells at a much faster rate in the absence of *FBXW7*, with a  
165 50% reduction in GFP-expressing cells by day 4, with wild-type cells largely unaffected until day  
166 16 (**Figure 2D, EV1E**). Supporting these results, when infected with lentivirus encoding for Cas9  
167 and gRNAs targeting *CCNL1*, HPAF-II *FBXW7*<sup>-/-</sup> mutant cells proliferated at a much slower rate  
168 when compared to wild-type HPAF-II cells (**Figure 2E, EV1E**). We conclude that loss of *CCNL1*  
169 is synthetic lethal with *FBXW7* mutation.

170

#### 171 **CCNL1 is a substrate of the SCF<sup>FBXW7</sup> E3 ligase.**

172 The well established role of SCF<sup>FBXW7</sup> in regulating cyclin E stability hinted that one potential  
173 mechanism underlying the observed synthetic lethality phenotype is that *CCNL1* is a novel  
174 substrate of the SCF<sup>FBXW7</sup> E3 ligase. In support, we noted increased steady state *CCNL1* levels  
175 in *FBXW7*<sup>-/-</sup> cells when compared to wild-type cells (**Figure 3A, EV2A**). Cycloheximide chase  
176 further revealed that the half-life of *CCNL1* was extended in *FBXW7*<sup>-/-</sup> vs wild-type cells (**Figure**

177 **3B,C**). Expression of a dominant-negative Cul1 mutant (Van Rechem et al., 2011) induced  
178 stabilization of CCNL1 at steady state, further indicating that an SCF complex is involved in  
179 regulation of CCNL1 (**Figure 3D, EV2B**). We next scanned the amino acid sequence of CCNL1  
180 for the presence of a canonical Cdc4 phosphodegron (CPD) motif present in the majority of  
181 FBXW7 substrates (Nash et al., 2001; Orlicky et al., 2003) and identified a TPXXS sequence at  
182 position 325-329 (**Figure 3E**). Analysis of CPD peptide binding to purified FBXW7 using  
183 fluorescence polarization assays revealed a requirement for dual phosphorylation at both T325  
184 and S329 within the CCNL1 CPD motif (**Figure 3F**), similar to what is seen for the FBXW7-Jun  
185 interaction (Wei et al., 2005), but in contrast to the FBXW7-cyclin E interaction where  
186 phosphorylation at the threonine residue is sufficient for maximal binding (Hao et al., 2007, and  
187 **Figure 3F**). Mutation of the TPXXS motif to VPXXA in the context of full length CCNL1  
188 extended the half life of CCNL1 compared to wild-type proteins following cycloheximide chase  
189 (**Figure 3G,H**). Co-expression of HA-CCNL1 with FLAG-FBXW7 further reduced the half-life of  
190 CCNL1, while co-expression with the substrate binding mutant FBXW7<sup>R465C</sup> fully stabilized  
191 CCNL1 expression (**Figure EV2G,H**), demonstrating a direct role of FBXW7 in regulating  
192 CCNL1 expression.

193 To verify that CCNL1 and FBXW7 are indeed interacting in cells, we performed an  
194 immunoprecipitation assay using overexpression of either FLAG-CCNL1 or FLAG-FBXW7, and  
195 detected interactions with endogenous FBXW7 and CCNL1 respectively (**Figure 4A,B**). We  
196 next wished to perform *in vitro* ubiquitination assays but were faced with a roadblock in our  
197 multiple attempts to purify CCNL1 from either Sf9 or *E.coli* cultures. We therefore employed a  
198 cellular ubiquitination assay in HEK293T cells to confirm CCNL1 ubiquitination and the role of  
199 T325 and S329 in the process (**Figure 4C**). A second cellular ubiquitination assay in HEK293T  
200 cells expressing a control sgRNA targeting *AAVS1*, or an sgRNA targeting *FBXW7*  
201 demonstrated that reducing FBXW7 expression reduced ubiquitination of CCNL1 (**Figure 4D,**  
202 **EV2C,D**). Using HEK293T cells expressing an *FBXW7*-targeting gRNA, we added a gRNA-  
203 resistant FLAG-FBXW7 cDNA and assessed CCNL1 ubiquitination. The results indicated that  
204 re-expression of FBXW7 rescued CCNL1 ubiquitination (**Figure 4E**). We detected an interaction  
205 between CCNL1 and endogenous CUL1 in HPAF-II cells, further supporting a role of the SCF  
206 complex in CCNL1 degradation. Interestingly, CUL4A was also co-immunoprecipitated with  
207 CCNL1 perhaps suggesting a role for this cullin in regulation of CCNL1 stability, similar to  
208 another FBXW7 substrate -Jun- which is degraded by both CUL1 and CUL4A based E3 ligases  
209 (Cang et al., 2007) (**Figure EV2E**). We conclude that CCNL1 is a bona fide substrate of the  
210 SCF<sup>FBXW7</sup> complex.

### 211 **FBXW7 regulates G2-M progression through regulation of CCNL1 stability.**

212 To identify whether CCNL1 has a role in cell cycle progression like other SCF substrates, a cell  
213 cycle profile experiment was performed following release of cells that were first arrested in  
214 mitosis using nocodazole. In wild-type cells, CCNL1 expression oscillates in a pattern similar to  
215 cyclin B, supporting a potential role of CCNL1 in the G2-M phase of the cell cycle (**Figure**  
216 **5A,B**). In contrast, in *FBXW7*<sup>-/-</sup> cells the cycling of CCNL1 levels is lost, supporting the role of  
217 FBXW7 in targeting CCNL1 for degradation in a cell cycle dependent manner (**Figure 5A,B**).  
218 Considering the previously described role of CCNL1 and CDK11 in cytokinesis (Renshaw et al.,  
219 2019), we assessed whether upregulation of CCNL1 through either *FBXW7* loss-of-function or  
220

221 *CCNL1* overexpression affected normal progression through mitosis. First, to assess the cell  
222 cycle dynamics during logarithmic growth, cell cycle profiles for wild-type, *FBXW7*<sup>-/-</sup> and  
223 *CCNL1*<sup>OE</sup> cells were generated by flow cytometry. This assay identified a decreased proportion  
224 of cells in the G2-M phase in both *FBXW7*<sup>-/-</sup> and *CCNL1*<sup>OE</sup> cell lines, suggestive of a shortened  
225 G2-M phase (**Figure 5C, EV3A**). Next, using the Eg5 kinesin inhibitor monastrol (Mayer et al.,  
226 1999) GFP-tubulin labeled cells were arrested in prometaphase overnight, and released before  
227 live-cell imaging to measure the timing of mitosis progression. Consistent with hyperactivity of  
228 CCNL1-CDK11 complexes, *FBXW7*<sup>-/-</sup> and *CCNL1*<sup>OE</sup> cell lines completed cell division with a  
229 mean of 295 and 255 minutes respectively while wild-type cells took an average of 350 minutes  
230 following monastrol washout (**Figure 5D,E and EV\_Movie1-3**) (Renshaw et al., 2019).  
231 Importantly, expression level of CCNL1 correlated with mitosis duration (**Figure 5E and 5F**). To  
232 further validate this shortened mitosis, the PIP-FUCCI reporter (Grant et al., 2018) (**Figure**  
233 **EV3B**) was employed to assess mitotic timing following nocodazole treatment. Indeed, *FBXW7*<sup>-/-</sup>  
234 and *CCNL1*<sup>OE</sup> cells exited mitosis faster following nocodazole treatment as detected by  
235 quantification of mCherry fluorescence (labelling cells in S and G2/M phases) at the bulk  
236 population level (**Figure EV3C**), as well as in individual cells exiting mitosis (**Figure EV3D**).

237 Considering a role for CCNL1 in mediating the final stages of mitosis, we wanted to  
238 assess the cell cycle profiles of HPAF-II wild-type, *FBXW7*<sup>-/-</sup> and *APC*<sup>-/-</sup> cells following treatment  
239 with LGK974, previously reported to arrest cells in G0 (Steinhart et al., 2017). Indeed, HPAF-II  
240 *FBXW7*<sup>-/-</sup> cells showed a higher proportion of actively dividing G2-M cells, with an average of  
241 6.5% of G2-M cells in the wild-type and 11% G2-M cells in the *FBXW7*<sup>-/-</sup> cell line following  
242 LGK974 treatment, suggesting that cells harboring an *FBXW7*-knockout or LOF mutation may  
243 bypass LGK974-induced cell cycle arrest by maintaining a pool of actively dividing cells (**Figure**  
244 **5G, EV4A**).

245

#### 246 ***FBXW7* loss-of-function and *CCNL1* overexpression sensitize cells to CDK11 inhibitor** 247 **OTS964**

248 A kinase inhibitor currently in preclinical development, OTS964, was recently identified to target  
249 CDK11, the cyclin-dependent kinase (CDK) partner of CCNL1 (Lin et al., 2019). Considering the  
250 requirement for *CCNL1* in *FBXW7*<sup>-/-</sup> HPAF-II cells, we aimed to assess whether inhibiting  
251 CDK11 using OTS964 could target this synthetic lethal interaction. *FBXW7*<sup>-/-</sup> HPAF-II cells were  
252 isolated and treated with OTS964 in a clonogenic growth assay, and were shown to be  
253 hypersensitive to CDK11 inhibition when compared to wild-type cells (**Figure 6A**). Similarly, two  
254 independent *CCNL1*<sup>OE</sup> clones demonstrated enhanced sensitivity to OTS964 when compared to  
255 wild-type cells, suggesting that CCNL1 expression through *FBXW7* LOF or genetic amplification  
256 sensitize cells to CDK11 inhibition (**Figure 6B**).

257 To understand the mechanism behind OTS964 sensitivity, cell cycle profiles of wild-  
258 type, *FBXW7*<sup>-/-</sup> and *CCNL1*<sup>OE</sup> cells were obtained by flow cytometry following 24 hours of  
259 OTS964 treatment. We identified that OTS964 leads to accumulation of cells in the G2-M phase  
260 of the cell cycle, consistent with previous findings (Lin et al., 2019). Interestingly, G2-M  
261 accumulation following OTS964 treatment was higher in *FBXW7*<sup>-/-</sup> and *CCNL1*<sup>OE</sup> cells when  
262 compared to wild-type cells suggesting that hyperactivity of CCNL1:CDK11 complexes in G2-M  
263 in these genotypes represent a tractable therapeutic vulnerability (**Figure 6D, EV4B**). We  
264 conclude that loss of post-translational control of CCNL1 levels is an oncogenic event that can

265 be preferentially targeted by CDK11 inhibitor in cancer cells and that CCNL1 levels could  
266 represent a biomarker to stratify patients or predict patient response.

267

### 268 ***FBXW7* mutation and *CCNL1* amplification are mutually exclusive**

269 Considering the high mutation burden of *FBXW7* across a wide range of cancers, and the  
270 observation that *CCNL1* amplification occurs in many cancer types, we performed an analysis  
271 using cBioPortal to determine the probability of a tumor harboring both *FBXW7* alteration or  
272 *CCNL1* amplification. This analysis identified that very few tumors harbor alterations in both  
273 *FBXW7* and *CCNL1*, indicating mutual exclusivity and suggesting that these genes function in  
274 the same pathway, and that alteration in both would be functionally redundant (**Figure 7A**).

275

### 276 ***FBXW7*-*CCNL1*-*CDK11* axis is therapeutically relevant in cervical cancer cell lines**

277 Given the high prevalence of *FBXW7* mutations and *CCNL1* amplification in cervical cancers  
278 (**Figure 7A**), we next screened a genotypically diverse panel of cervical cancer cell lines for  
279 their susceptibility to OTS964. The C33A cell line carries a heterozygous *FBXW7*<sup>R465C</sup> LOF  
280 mutation and exhibited high levels of CCNL1 expression when compared to Caski and SiHa,  
281 which are wild-type at this locus (**Figure 7B**). Supporting a deregulation of the CCNL1-CDK11  
282 axis, the C33A cell line exhibited increased sensitivity to the CDK11 inhibitor OTS964 than the  
283 other *FBXW7*<sup>WT</sup> lines Caski and SiHa (**Figure 7C**). C33A cells showed an accumulation of cells  
284 in the G2-M phase of the cell cycle upon addition of OTS964, whereas Caski and SiHa cell lines  
285 show minimal effect (**Figure 7D, EV4C**) - validating the sensitivity of this cell line to OTS964 and  
286 perturbation of the G2-M transition. Further, to confirm the on-target toxicity of OTS964 in C33A  
287 cells, we performed a genome-wide chemogenomic CRISPR screen using an IC50 dose of  
288 OTS964; this screen identified *CDK11A* and *CCNL1* as important in mediating response to  
289 OTS964 (**Figure EV4D**). We conclude that CCNL1 levels could represent a biomarker to predict  
290 response to CDK11 inhibitors for treatment of cancers that harbor LOF mutations in *FBXW7* or  
291 *CCNL1* amplification (**Figure 7E**).

292

### 293 **Discussion**

294

295 The study of the tumor suppressor gene *FBXW7* as substrate specific receptor of a SCF  
296 complex has garnered significant interest, and various oncogenic substrates of *FBXW7* have  
297 been identified since its discovery (Koepp, 2001; Takada et al., 2017; Wei et al., 2005; Welcker  
298 et al., 2004a, 2004b). Mechanistically, the substrate phosphodegron CPD motif has also been  
299 studied in depth, which describes the I/L-I/L/P-TPXXS motif as the canonical binding moiety  
300 required for substrate recognition, in which phosphorylation at the threonine and/or serine  
301 residues were described to be important for *FBXW7* binding (Nash et al., 2001). The degron  
302 motif identified and validated in this work for *CCNL1* matches the consensus CPD motif, with  
303 the exception that *CCNL1* does not contain the I/L-I/L/P sequence directly upstream of the  
304 TPXXS sequence. Our work highlighted a requirement for dual phosphorylation at both the  
305 threonine and serine residues within the *CCNL1* CPD for recognition by *FBXW7*, similar to what  
306 was observed for c-Jun (Wei et al., 2005). This is in contrast to other *FBXW7* substrates such  
307 as cyclin E (Figure 3E) and c-Myc (Welcker et al., 2004b) where phosphorylation at only one  
308 site is sufficient. The functional implications of this differential requirement (single vs dual

309 phosphorylation) is currently unknown but suggests a possible additional layer of regulation  
310 through the activity of a priming kinase or other signaling events. Additionally, this data supports  
311 the role of FBXW7 in regulating the G2-M transition through control of CCNL1 protein levels - a  
312 novel role for this ubiquitous E3 ligase.

313  
314 Despite early evidence that *CCNL1* functions as an oncogene in a subset of cancers (Muller et  
315 al., 2006; Redon et al., 2002; Sticht et al., 2005), relatively little progress has been made  
316 towards understanding the molecular mechanisms underlying its role in tumor progression or  
317 cell cycle progression. In this study, using an engineered cell model of *FBXW7* LOF and cervical  
318 cancer cell lines, harboring wild-type and mutated genotypes for *FBXW7*, we confirmed the  
319 mitotic role of CCNL1 (Renshaw et al., 2019) and revealed a molecular basis for deregulation of  
320 the FBXW7-CCNL1 axis in cancer. Indeed, both FBXW7 LOF mutations and *CCNL1*  
321 amplification would be predicted to result in upregulation of CCNL1 levels and hyperactivation of  
322 CDK11. Interestingly, *FBXW7* mutations and *CCNL1* amplification events are mutually exclusive  
323 and are highly prevalent in many cancer types. Cervical squamous cell carcinoma appears to be  
324 a cancer with frequent alteration in this axis (38% of FBXW7 mutations and 10% of *CCNL1*  
325 amplification), which could benefit from CDK11 inhibitor treatment or from other therapies  
326 directed at this pathway. Uterine Carcinosarcoma (UCS), an aggressive gynecological cancer  
327 with poor prognosis and treatment options, also present with high frequency of *FBXW7*  
328 mutations (38%). This, combined with recent studies in engineered mouse models that suggest  
329 concurrent loss of function in *FBXW7* and *PTEN*, is a specific driver of UCS tumorigenesis and  
330 aggressive tumor behavior (Cuevas et al., 2019) provide further rationale for targeting this  
331 molecular perturbation in this disease. *CCNL1* amplification, on the other hand, most frequently  
332 occurs in squamous cell cancers such as primarily lung squamous cell carcinoma (19%),  
333 cervical squamous cell carcinoma (10%) as well as head and neck squamous cell carcinoma  
334 (9%) (Figure 6A). The *CCNL1* gene resides on chromosome 3q25, a region commonly amplified  
335 along with *PIK3CA* (Redon et al., 2001) a known human oncogene. Determining whether  
336 *CCNL1* amplification is merely a collateral “passenger” event or is required along with *PIK3CA*  
337 for cancer initiation or tumor progression remains to be determined. Whether these tumors are  
338 more sensitive to CDK11 inhibitors, such as OTS964, in patients that harbor amplification of the  
339 3q25 genomic region also remains to be tested.

340  
341 Precision oncology is a burgeoning field currently limited by the scarcity of genetic vulnerabilities  
342 identified across multiple cancer types. In addition, identification of biomarkers that may predict  
343 response to targeted treatments is especially important for stratifying patients for clinical trials to  
344 assess the true benefit of a new therapeutic modality. This work has identified a novel synthetic  
345 lethal genetic interaction that has the potential to impact a broad range of cancer types. In this  
346 study we have demonstrated that CCNL1 expression in cells can predict sensitivity to a novel  
347 CDK11 inhibitor, OTS964. Originally identified as a novel inhibitor of the kinase TOPK (T-LAK  
348 cell originating protein kinase) (Matsuo et al., 2014), it is unlikely that the activity of OTS964 in  
349 our HPAF-II model is based on TOPK targeting, considering this gene is non-essential in both  
350 HPAF-II wild-type and *FBXW7*<sup>-/-</sup> cells and that a chemogenomic CRISPR screen confirmed the  
351 on-target activity of OTS964 (Fig. EV4D). The importance of CDK11 in cancer progression has



352 been predicted for many years, and our study outlines a novel targeting strategy to guide the  
353 use of CDK11 inhibitors.

354  
355 This work has identified CCNL1 as a novel substrate of tumor suppressor FBXW7, with  
356 implications on the growth requirement of cells and tumors harboring *FBXW7* mutations.  
357 Through uncontrolled CCNL1 expression, the mitotic phase of the cell cycle is shortened as a  
358 result of increased CDK11 activity, which sensitizes cells to its inhibition. CCNL1 is therefore  
359 another FBXW7 substrate along with cyclin E, c-myc and c-jun, which have all been linked to  
360 cancer. Understanding the individual roles of these substrates and the cellular and cancer  
361 contexts where their deregulation contributes to cancer initiation and progression will be  
362 important future work needed to realize the potential of various targeted therapies inhibiting  
363 these signaling axes.

## 364 **Materials and Methods**

### 365 **Cell Culture & lentivirus production:**

366 HPAF-II, HEK293T, SiHa, and C33A cells (ATCC) were cultured in DMEM (Gibco) + 10% FBS  
367 (Gibco) and 5% antibiotic & antimycotic (Gibco), Caski (ATCC) cells were cultured in RPMI  
368 (Gibco) + 10% FBS and 1% antibiotic & antimycotic, all at 37°C and 5% humidity. Cells were  
369 routinely tested for mycoplasma (Lonza), and authenticated by STR profiling at The Center for  
370 Applied Genomics at Sickkids Hospital, Toronto. HEK293T cells were seeded to 60%  
371 confluence, and the following day transfected with 6µg target plasmid, 6µg pSPAX (Addgene  
372 #12260) and 1ug pMD2.G (Addgene #12259) in 60µg polyethylenimine (Sigma-Aldrich) and  
373 Opti-MEM (Gibco) . 24 hours post-transfection, media was replaced. Lentivirus was harvested  
374 48 hours post-transfection, filtered through a 0.45µm filter, and aliquoted and stored at -80°C  
375 prior to use.  
376

377

### 378 **Cell treatments**

379 Cycloheximide chase: following overnight serum starvation, cells were released into 50µg/ml  
380 (HEK293T) or 100µg/ml (HPAF-II) cycloheximide (Sigma-Aldrich) for the indicated time points.  
381 Clonogenic assays: OTS964 (Selleck Chemicals) was used to treat cells at indicated  
382 concentrations for 14 days, with media refreshed every 3-4 days. MG132 (Sigma-Aldrich) was  
383 used at 10µM in HEK293T cells for 10 hours, and 1µM in HPAF-II cells for 18 hours.  
384 Nocodazole (Cell Signaling Technologies) was used at 150µg/mL for 18h. Monastrol was used  
385 at 150µM for 18 hours. Cells were treated with 500nM LGK974 for 24 hours to assess cell cycle  
386 dynamics.  
387

388

### 389 **Genome-wide CRISPR screens:**

390 Positive Selection: HPAF-II cells expressing Cas9 were infected with the Toronto knockout  
391 library version 1 (TKOv1) - a pooled sgRNA lentiviral library (Hart et al., 2015) at a multiplicity of  
392 infection of 0.3, in the presence of 8µg/ml polybrene (Sigma-Aldrich) for 24 hours. Cells were  
393 treated with 2µg/ml puromycin (Life Technologies) for 48 hours. 7 days post-selection, cells  
394 were split into treatment groups - one using an LD90 dose of LGK974 at 20nM, and the second  
395 a DMSO (Sigma-Aldrich) control; duplicates were included for both treatment arms. LGK974  
treatment was harvested at day 28, and DMSO treatment at day 31. Genomic DNA extracted

396 using the QIAmp DNA Blood Maxi Kit (Qiagen). Genomic DNA samples were amplified, and  
397 barcoded using i5 and i7 adaptor primers for Illumina next generation sequencing. Barcoded  
398 PCRs were sequenced with the Illumina HiSeq2500. Sequenced gRNAs were mapped to the  
399 TKOv1 library using MaGECK 0.5.3, and read counts were normalized by total reads per  
400 sample before averaging biological replicates and determining gRNA enrichment.

401 Dropout: HPAF-II WT and *FBXW7*<sup>-/-</sup> cells were infected with the Toronto knockout library  
402 version 3 (TKOv3) - a pooled sgRNA lentiviral library (Hart et al., 2017) at a multiplicity of  
403 infection of 0.3, in the presence of 8µg/ml polybrene (Sigma) for 24 hours. Cells were treated  
404 with 2µg/ml puromycin for 48 hours. Following selection, pooled cells were split into three  
405 replicates, and passed every 4 days for 24 days, maintaining 18 million cells per replicate. Cell  
406 pellets at T=0, 12 and 24 days were collected, and genomic DNA extracted using the QIAmp  
407 DNA Blood Maxi Kit (Qiagen). Genomic DNA samples were amplified, and barcoded using i5  
408 and i7 adaptor primers for Illumina next generation sequencing. Barcoded PCRs were  
409 sequenced with the Illumina HiSeq2500 with read depths of 200-fold coverage. Sequenced  
410 gRNAs were mapped to the TKOv3 library using MaGECK 0.5.3 (Li et al., 2014) . Read counts  
411 were normalized and fold-change of gRNA distribution compared to T=0 was calculated using  
412 the BAGEL package (Hart and Moffat, 2016). BAGEL analysis was performed, and Bayes  
413 Factors were compared between HPAF-II wildtype and *FBXW7*<sup>-/-</sup> cells. Z-scores of differential  
414 Bayes Factors between wild-type and *FBXW7*<sup>-/-</sup> were calculated.

415 Chemogenomic: C33A cells were infected with the Toronto knockout library version 3 (TKOv3)  
416 at a multiplicity of infection of 0.3, in the presence of 8µg/ml polybrene (Sigma) for 24 hours.  
417 Cells were treated with 2µg/ml puromycin for 48 hours. Following selection, pooled cells were  
418 split into two arms with two replicates per arm. The first arm was treated with DMSO for 16  
419 days, the second arm was treated with 95nM of OTS964 for 16 days. Cell pellets at T=0, 12 and  
420 24 days were collected, and genomic DNA extracted using the QIAmp DNA Blood Maxi Kit  
421 (Qiagen). Genomic DNA samples were amplified, and barcoded using i5 and i7 adaptor primers  
422 for Illumina next generation sequencing. Barcoded PCRs were sequenced with the Illumina  
423 HiSeq2500 with read depths of 200-fold coverage. Sequenced gRNAs were mapped to the  
424 TKOv3 library using MaGECK 0.5.3 (Li et al., 2014). gRNAs inducing resistance or synthetic  
425 lethal with OTS964 treatment were assessed using the DrugZ algorithm (Colic et al., 2019).

426

#### 427 **Generation of *FBXW7* and *APC* mutant cell line**

428 HPAF-II were transfected via electroporation using the Neon system (ThermoFisher Scientific)  
429 under the following conditions; 2µg of DNA (pX330 [Addgene # 42230] - sg*FBXW7* or sg*APC*,  
430 see sgRNA table) 1150V, 30ms and 2 pulses. Cells recovered for 2 days in full media before the  
431 addition of 100nM LGK974 (Cayman Chemicals). The polyclonal cell lines were validated for  
432 editing using TIDE (tracking of insertions and deletions) (Brinkman et al., 2014).

433

#### 434 **Generation of *CCNL1* overexpressing cell line**

435 HPAF-II wild-type cells were infected with lentivirus carrying a FLAG-CCNL1 cDNA, in the  
436 pLenti-puro vector (Addgene #39481). Cells were infected with an ~0.3 MOI of lentivirus  
437 overnight in the presence of 8µg/ml polybrene. The following day, virus-containing media was  
438 removed, and cells were selected in 2µg/ml puromycin for 48 hours.

439

440 **Generation of GFP-tubulin cell lines**

441 HPAF-II wild-type, *FBXW7*<sup>-/-</sup> and *CCNL1*<sup>OE</sup> cells were infected with lentivirus carrying tubulin-  
442 GFP cDNA, in the pLKO.1 vector (a kind gift from Dr Jason Moffat). Cells were infected with an  
443 ~0.3 MOI of lentivirus overnight in the presence of 8ug/ml polybrene. The following day, virus-  
444 containing media was removed, and cells were selected in 2ug/ml puromycin for 48 hours.

445

446 **Clone isolation for HPAF-II *FBXW7*<sup>-/-</sup> and *CCNL1*<sup>OE</sup>**

447 HPAF-II *FBXW7*<sup>-/-</sup> and *CCNL1*<sup>OE</sup> cells were seeded at 0.5 cells/well in multiple 96-well plates.  
448 Single clones were expanded, and tested for *FBXW7*-knockout and *CCNL1* expression by  
449 western blot. Two clones were chosen and moved forward to clonogenic growth assays.

450

451 **Cell competition assay**

452 HPAF-II wildtype and *FBXW7*<sup>-/-</sup> cells expressing Cas9 were infected with pLentiguide-2A-GFP  
453 or pLentiGuide-2A-mCherry-AAVS1 (kind gifts from Dr Daniel Durocher, Lunenfeld-Tanenbaum  
454 Research Institute) lentivirus at an MOI of ~0.3 in the presence of 8µg/ml polybrene. Cells were  
455 infected overnight, and treated with 2µg/ml puromycin for 48 hours. Following selection cells  
456 were left to recover for 24 hours. Cells transduced with pLentiguide-2A-GFP targeting *AAVS1* or  
457 *CCNL1* were mixed 1:1 with pLentiGuide-2A-mCherry-AAVS1 expressing cells, and  
458 GFP:mCherry ratios were measured by flow cytometry (Beckman Coulter CytoFLEX) every 4  
459 days for 16 days. Relative fitness was normalized to AAVS1-infected cells.

460

461 **Proliferation assay**

462 HPAF-II wildtype and *FBXW7*<sup>-/-</sup> cells expressing Cas9 were infected with pLentiguide-2A-GFP  
463 virus stocks at an MOI of ~0.3 in the presence of 8µg/ml polybrene. Cells were infected  
464 overnight, and treated with 2µg/ml puromycin for 48 hrs. Following selection, fresh media was  
465 added, and cells were left for 24 hours to grow. Cells were seeded to ~2500 cells/well in  
466 triplicate in a 96-well plate, and left overnight to attach. Plates were moved to the Incucyte  
467 (Sartorius) and confluence was tracked over time. Cell confluence in each line was normalized  
468 to AAVS1-infected cells.

469

470 **Western blotting**

471 All samples were lysed in 4X Laemmli Sample Buffer (50mM Tris-HCl pH 6.8, 2% SDS, 10%  
472 glycerol, 1% β-mercaptoethanol, 12.5mM EDTA, 0.02% bromophenol blue). Lysates were  
473 sonicated, boiled, and centrifuged to pellet insoluble material. Approximately 10µg of protein  
474 was loaded per sample on a 4-15% SDS-PAGE Stain-Free TGX precast gel (BioRad). Gels  
475 were run at 150V for approximately 60 minutes. Gels were transferred to methanol-activated  
476 PVDF (BioRad) at 90V for 120 minutes. Membranes were blocked in 5% milk in Tris-buffered  
477 Saline (pH 7.4) + 1% Tween-20 (TBS-T) for 1 hour, and incubated with corresponding primary  
478 antibodies overnight (see antibody table). The following day, membranes were washed 4 times  
479 in TBS-T, and incubated with corresponding secondary antibodies for 1 hour, in 5% milk in TBS-  
480 T, at room temperature with agitation. Membranes were washed, and detected using  
481 SuperSignal West Pico PLUS chemiluminescent substrate (ThermoFisher) and imaged on the  
482 Chemidoc-MP (BioRad).

483 Cytoplasmic fractionation: 800,000 cells from each condition were lysed in ice-cold cytoplasmic  
484 extraction buffer (10mM HEPES pH8, 1.5mM MgCl<sub>2</sub>, 10mM NaCl, 0.5mM DTT, 1mM EDTA)  
485 and incubated on ice for 15 minutes. NP-40 was added to a final concentration of 0.05%,  
486 lysates mixed thoroughly, and the insoluble fraction was collected by centrifugation.  
487 Cytoplasmic fraction was quantified using the Qubit (ThermoFisher) Protein quantification kit,  
488 and stored at -80°C until western blotting.  
489 Quantification: all western blot quantification was performed by densitometry in ImageJ (FIJI).

490

#### 491 **Live Cell Imaging**

492 GFP-tubulin expressing cells were plated into 8-well chamber slides and left overnight to  
493 adhere. Cells were then incubated with 150µM monastrol (Selleck Chemicals) overnight. The  
494 following day, monastrol was washed out, and cells were imaged every 10 minutes for 8 hours  
495 on the Evos FL Auto2 (ThermoFisher) at 20X magnification, at 37°C with 5% CO<sub>2</sub>.

496 Representative movies were imaged at 37°C and 5% CO<sub>2</sub> on a laser scanning confocal  
497 microscope (LSM700, Carl Zeiss) at 8-bit with Plan-Apochromat 63X/1.4NA oil immersion  
498 objective using Zen software. Z-stacks were captured every 15 minutes for 8 hours. Images  
499 were compiled in ImageJ (FIJI).

500 PIP-FUCCI imaging: PIP-FUCCI expressing cells were seeded into 6-well plates. Cells were  
501 then treated with 150nM nocodazole overnight. The following day, nocodazole was removed,  
502 and cells were imaged every 30 minutes in the Incucyte (Sartorius). mCherry expression was  
503 quantified within the incucyte software, and plotted over time.

504

#### 505 **Two-dimensional Cell Cycle Flow Cytometry**

506 Cells were grown in logarithmic proliferation, and harvested using 0.025% Trypsin-EDTA. Cells  
507 were washed in ice-cold PBS, and fixed in 70% ethanol under vortex, and stored at -20°C  
508 overnight. The following day, cells were washed 2x in ice-cold PBS, solubilized in PBS + 1%  
509 BSA + 0.15% Triton-X for 15 minutes on ice. Cells were washed and incubated with anti-  
510 phosphoH3 (Ser10) (CST) antibody for 1.5h on ice. Cells were washed 2X in PBS + 1% BSA,  
511 and incubated with anti-Rb-Alexa488 (ThermoFisher) for 1h on ice. Cells were washed and  
512 incubated with 20µg/mL RNase A (Invitrogen) and 50µg/mL propidium iodide (BioShop) for 30  
513 minutes prior to acquisition on a Beckman Coulter CytoFLEX flow cytometer. Cells were gated  
514 for singlets, and cell cycle phase was determined using the intensity in the PE channel. G2-M  
515 cells were quantified by gating on all 4N within the pH3+ region.

516

#### 517 **Nocodazole Release Cell Cycle Flow Cytometry**

518 Cells were treated with 150µg/ml nocodazole (Cell Signaling Technology) for 18 hours.  
519 Following synchronization, cells were released into full medium. Samples were collected for  
520 western blotting and flow cytometry at indicated time points. For flow cytometry, samples were  
521 trypsinized, collected and washed twice in PBS. Cells were fixed with ice-cold 70% ethanol  
522 under vortex, and stored at -20°C. Cells were washed twice in PBS and stained in 50µg/ml  
523 propidium iodide (BioShop) in 25nM RNase A (Invitrogen) in PBS. Samples were run on a  
524 Beckman Coulter CytoFLEX flow cytometer. Cells were gated for singlets, and cell cycle phase  
525 was determined using the intensity of propidium iodide in the PE channel.

526

## 527 Immunoprecipitations

528 Following treatments, 15cm plates were scraped on ice in 1mL PBS and cells collected. Pellets  
529 were stored at -80°C until processing. For non-denaturing lysis, pellets were resuspended in  
530 RIPA buffer (0.1% SDS, 0.1% NP-40, 2mM EDTA, 150mM NaCl, 50mM Tris-HCl pH7.6, 0.5%  
531 sodium deoxycholate, 1X protease inhibitor, 10mM NaF, 0.25mM NaOVO<sub>3</sub>), for denaturing lysis,  
532 SDS was increased to 1%. Lysates were sonicated, and cleared at 20,000 x g for 20 minutes.  
533 Antibodies or FLAG-beads (Sigma-Aldrich) were added to lysates (denaturing lysates first  
534 diluted to 0.1% SDS) and incubated at 4°C with end over end rotation for 3 hours. Pre-  
535 equilibrated Protein G conjugated agarose beads (Roche) were added for 1 hour.. Beads were  
536 collected, washed several times in lysis buffer, and boiled at 95°C for 5 minutes in 4X Laemmli  
537 buffer. Samples were stored at -20°C until western blotting.

538

## 539 Cellular ubiquitination assay

540 HEK293T cells were transfected with plasmids carrying indicated cDNAs, using PEI. Media was  
541 changed the following day. On day 2, cells were starved overnight through the removal of FBS  
542 from media. Following overnight starvation, cells were treated with 10µM MG132 (in full media)  
543 for 8h. Cells were scraped in ice-cold PBS, and stored at -80°C prior to processing. Lysates  
544 were processed as per Immunoprecipitation protocol (denaturing lysis), with the following  
545 adjustments: following lysis, samples were boiled at 90°C for 10 minutes, prior to sonication.  
546 Elution from Protein-G beads was performed by boiling at 55°C for 5 minutes.

547

## 548 Fluorescence Polarization Assay

549 FITC-CCNL1<sup>321-332</sup> peptides (numbering according to Uniprot Q9UK58-1) were purchased from  
550 GenScript and FITC-cyclin E<sup>377-384</sup> peptides (numbering according to Uniprot P24864-3) were  
551 purchased from BioBasic. Experiments were performed by combining 25nM FITC-conjugated  
552 peptides and the indicated amount of Skp1-FBXW7<sup>263-707</sup> complex in buffer containing 25 mM  
553 HEPES pH 7.5, 100 mM NaCl, 5 mM DTT, 0.01% Brij-35 and 0.1 mg/mL BSA. Mixed samples  
554 (25 µL total volume) were incubated for 30 min in 384-well, black, flat-bottom, low-flange plates  
555 (Corning, 3573). Fluorescence intensities were measured using a BioTek Synergy Neo plate  
556 reader with excitation and absorbance at 485/528 nm respectively. Fluorescence polarization  
557 was calculated with the Gen5 Data Analysis Software. Binding constants for three independent  
558 experiments were calculated using GraphPad Prism v8.2.1 (GraphPad) with mean and standard  
559 deviation being reported in the figure.

560

## 561 Statistical tests

562 All statistical analyses were performed in GraphPad Prism. Data are represented as a mean ±  
563 SEM of at least three independent biological replicates.

564

## 565 Antibody list

| Target             | Vendor              | Cat#      |
|--------------------|---------------------|-----------|
| Cyclin L1 (Rabbit) | Bethyl Laboratories | A302-058A |
| FBXW7 (Rabbit)     | Bethyl Laboratories | A301-720A |

|                    |                              |           |
|--------------------|------------------------------|-----------|
| HA-tag (Rb)        | Cell Signalling Technologies | 3724S     |
| HA-tag (Ms)        | Cell Signalling Technologies | 2367S     |
| Myc-tag            | Cell Signalling Technologies | 2276S     |
| GAPDH              | Thermo Fisher                | AM4300    |
| FLAG-tag           | Thermo Fisher                | MA1-91878 |
| $\beta$ Catenin    | Cell Signalling Technologies | 8480S     |
| phospho-H3 (Ser10) | Cell Signalling Technologies | 9701S     |
| Cul1               | Cell Signalling Technologies | 4995S     |
| Cul4A              | Cell Signalling Technologies | 2699S     |

566

567

568 **Oligo list**

| Oligo           | Sequence                  |
|-----------------|---------------------------|
| sgCCNL1-1       | AAGTTATCAAAGCAGAGAGG      |
| sgCCNL1-2       | TTGAAATCGAACAACACAT       |
| sgPSMD1         | GACCAGAGCCACAATAAGCCA     |
| sgAAVS1         | GTCCCCTCCACCCCACAGTG      |
| sgFBXW7         | TGGTTCTGAGGTCCGCTCTT      |
| FBXW7_TIDE_F    | TCACCTTCCATTCCATTGAGAGT   |
| FBXW7_TIDE_R    | GAGAAAGGAAGAAATGTCATAACCA |
| sgAPC           | ATTTTTAGGTA CTTCTCGCT     |
| APC_TIDE_F      | GGCTGCCACTTGCAAAGTTTC     |
| APC_TIDE_R      | GATGACTTTGTTGGCATGGCAG    |
| sgFBXW7-Br      | ACAGAATTGATACTAACTGG      |
| FBXW7_br_TIDE_F | GGGATTGATGAACCATTGCACA    |
| FBXW7_br_TIDE_R | GCATTATTTTTCTGGCTGACGAA   |

569

570

## 571 **Acknowledgements**

572 This work was supported by grants from the Canadian Institutes of Health Research (PJT-  
573 148691 to SA; FDN 143277 to FS), Canadian Cancer Society (CCSRI-Impact grant to FS  
574 (704116) and SA (705045) and the Terry Fox Research Institute (to FS). FS is a Canada  
575 Research Chair. SO was supported by the Ontario Graduate Scholarship and the Centre for  
576 Pharmaceutical Oncology scholarships. Authors would like to thank Andrew Wilde, Michael  
577 Ohh, and Brian Raught for reagents, Kin Chan at the LTRI sequencing facility, Azza Al-  
578 Mahrouki at the CPO facility, and all members of the Angers lab for support and helpful  
579 discussions.

580

## 581 **Author Contributions**

582 Conceptualization: S.O., Z.S., M.M., S.A. Investigation: S.O., S.K., S.Or., Z.S., M.M., S.L., Y.K.  
583 Writing - original draft: S.O., S.A. Writing - review & edits: S.O., S.K., M.M., F.S., S.A.  
584 Supervision: F.S., S.A.

585

## 586 **Declaration of interests**

587 S.O., Z.S., and S.A. are inventors on a patent involving the use of OTS964 in FBXW7-mutated  
588 cancers (WO2021108927A1). F.S. is a founder and consultant at Repare Therapeutics.

589

## 590 **Data Availability**

591 This study includes no data deposited in external repositories. All CRISPR screening data can  
592 be found in EV File 1.

593

## 594 **References**

595

- 596 Ahmed, R.L., Shaughnessy, D.P., Knutson, T.P., Vogel, R.I., Ahmed, K., Kren, B.T., Trembley,  
597 J.H., 2019. *Pharmaceuticals* 12.
- 598 Amit, S., Hatzubai, A., Birman, Y., Andersen, J.S., Ben-Shushan, E., Mann, M., Ben-Neriah, Y.,  
599 Alkalay, I., 2002. *Genes Dev.* 16, 1066–1076.
- 600 Brinkman, E.K., Chen, T., Amendola, M., van Steensel, B., 2014. *Nucleic Acids Res.* 42, e168.
- 601 Cang, Y., Zhang, J., Nicholas, S.A., Kim, A.L., Zhou, P., Goff, S.P., 2007. *Proc. Natl. Acad. Sci.*  
602 104, 2733–2737.
- 603 Chen, H.-H., Wang, Y.-C., Fann, M.-J., 2006. *Mol. Cell. Biol.* 26, 2736–2745.
- 604 Chen, H.-H., Wong, Y.-H., Geneviere, A.-M., Fann, M.-J., 2007. *Biochem. Biophys. Res.*  
605 *Commun.* 354, 735–740.
- 606 Colic, M., Wang, G., Zimmermann, M., Mascall, K., McLaughlin, M., Bertolet, L., Lenoir, W.F.,  
607 Moffat, J., Angers, S., Durocher, D., Hart, T., 2019. *Genome Med.* 11, 52.
- 608 Cornelis, S., Bruynooghe, Y., Denecker, G., Van Huffel, S., Tinton, S., Beyaert, R., 2000. *Mol.*  
609 *Cell* 5, 597–605.
- 610 Cuevas, I.C., Sahoo, S.S., Kumar, A., Zhang, H., Westcott, J., Aguilar, M., Cortez, J.D.,  
611 Sullivan, S.A., Xing, C., Hayes, D.N., Brekken, R.A., Bae-Jump, V.L., Castrillon, D.H.,  
612 2019. *Proc. Natl. Acad. Sci.* 116, 25880–25890.
- 613 Grant, G.D., Kedziora, K.M., Limas, J.C., Cook, J.G., Purvis, J.E., 2018. *Cell Cycle* 17, 2496–  
614 2516.
- 615 Gupta-Rossi, N., Le Bail, O., Gonen, H., Brou, C., Logeat, F., Six, E., Ciechanover, A., Israël,  
616 A., 2001. *J. Biol. Chem.* 276, 34371–34378.

- 617 Hao, B., Oehlmann, S., Sowa, M.E., Harper, J.W., Pavletich, N.P., 2007. *Mol. Cell* 26, 131–143.
- 618 Hart, T., Chandrashekhar, M., Aregger, M., Steinhart, Z., Brown, K.R., MacLeod, G., Mis, M.,
- 619 Zimmermann, M., Fradet-Turcotte, A., Sun, S., Mero, P., Dirks, P., Sidhu, S., Roth, F.P.,
- 620 Rissland, O.S., Durocher, D., Angers, S., Moffat, J., 2015. *Cell* 163, 1515–1526.
- 621 Hart, T., Moffat, J., 2016. *BMC Bioinformatics* 17, 164.
- 622 Hart, T., Tong, A.H.Y., Chan, K., Van Leeuwen, J., Seetharaman, A., Aregger, M.,
- 623 Chandrashekhar, M., Hustedt, N., Seth, S., Noonan, A., Habsid, A., Sizova, O.,
- 624 Nedyalkova, L., Climie, R., Tworzyanski, L., Lawson, K., Sartori, M.A., Alibeh, S., Tieu,
- 625 D., Masud, S., Mero, P., Weiss, A., Brown, K.R., Usaj, M., Billmann, M., Rahman, M.,
- 626 Constanzo, M., Myers, C.L., Andrews, B.J., Boone, C., Durocher, D., Moffat, J., 2017.
- 627 *G3 Bethesda Md* 7, 2719–2727.
- 628 Jiang, J.-X., Sun, C.-Y., Tian, S., Yu, C., Chen, M.-Y., Zhang, H., 2016. *Tumour Biol. J. Int. Soc.*
- 629 *Oncodevelopmental Biol. Med.* 37, 13893–13902.
- 630 Jiang, X., Hao, H.-X., Growney, J.D., Woolfenden, S., Bottiglio, C., Ng, N., Lu, B., Hsieh, M.H.,
- 631 Bagdasarian, L., Meyer, R., Smith, T.R., Avello, M., Charlat, O., Xie, Y., Porter, J.A.,
- 632 Pan, S., Liu, J., McLaughlin, M.E., Cong, F., 2013. *Proc. Natl. Acad. Sci. U. S. A.* 110,
- 633 12649–12654.
- 634 Koeppe, D.M., 2001. *Science* 294, 173–177.
- 635 Li, W., Xu, H., Xiao, T., Cong, L., Love, M.I., Zhang, F., Irizarry, R.A., Liu, J.S., Brown, M., Liu,
- 636 X.S., 2014. *Genome Biol.* 15, 554.
- 637 Lin, A., Giuliano, C.J., Palladino, A., John, K.M., Abramowicz, C., Yuan, M.L., Sausville, E.L.,
- 638 Lukow, D.A., Liu, L., Chait, A.R., Galluzzo, Z.C., Tucker, C., Sheltzer, J.M., 2019. *Sci.*
- 639 *Transl. Med.* 11.
- 640 Liu, C., Li, Y., Semenov, M., Han, C., Baeg, G.H., Tan, Y., Zhang, Z., Lin, X., He, X., 2002. *Cell*
- 641 108, 837–847.
- 642 Liu, X., Gao, Y., Shen, J., Yang, W., Choy, E., Mankin, H., Hornicek, F.J., Duan, Z., 2016. *Mol.*
- 643 *Cancer Ther.* 15, 1691–1701.
- 644 Loeb, K.R., Kostner, H., Firpo, E., Norwood, T., D. Tsuchiya, K., Clurman, B.E., Roberts, J.M.,
- 645 2005. *Cancer Cell* 8, 35–47.
- 646 Loyer, P., Trembley, J.H., 2020. *Semin. Cell Dev. Biol.* 107, 36–45.
- 647 Mao, J.-H., Perez-Losada, J., Wu, D., Delrosario, R., Tsunematsu, R., Nakayama, K.I., Brown,
- 648 K., Bryson, S., Balmain, A., 2004. *Nature* 432, 775–779.
- 649 Mateyak, M.K., Obaya, A.J., Sedivy, J.M., 1999. *Mol. Cell. Biol.* 19, 4672–4683.
- 650 Matsuo, Y., Park, J.-H., Miyamoto, T., Yamamoto, S., Hisada, S., Alachkar, H., Nakamura, Y.,
- 651 2014. *Sci. Transl. Med.* 6, 259ra145.
- 652 Mayer, T.U., Kapoor, T.M., Haggarty, S.J., King, R.W., Schreiber, S.L., Mitchison, T.J., 1999.
- 653 *Science* 286, 971–974.
- 654 Minella, A.C., Grim, J.E., Welcker, M., Clurman, B.E., 2007. *Oncogene* 26, 6948–6953.
- 655 Minella, A.C., Loeb, K.R., Knecht, A., Welcker, M., Varnum-Finney, B.J., Bernstein, I.D.,
- 656 Roberts, J.M., Clurman, B.E., 2008. *Genes Dev.* 22, 1677–1689.
- 657 Mitra, S., Mazumder (Indra), D., Basu, P.S., Mondal, R.K., Roy, A., Roychoudhury, S., Panda,
- 658 C.K., 2010. *Mol. Carcinog.* 49, 935–943.
- 659 Muller, D., Millon, R., Théobald, S., Hussenet, T., Wasyluk, B., du Manoir, S., Abecassis, J.,
- 660 2006. *Br. J. Cancer* 94, 1041–1044.
- 661 Nash, P., Tang, X., Orlicky, S., Chen, Q., Gertler, F.B., Mendenhall, M.D., Sicheri, F., Pawson,
- 662 T., Tyers, M., 2001. *Nature* 414, 514–521.
- 663 Nateri, A.S., Riera-Sans, L., Da Costa, C., Behrens, A., 2004. *Science* 303, 1374–1378.
- 664 Oberg, C., Li, J., Pauley, A., Wolf, E., Gurney, M., Lendahl, U., 2001. *J. Biol. Chem.* 276,
- 665 35847–35853.
- 666 Ohtsubo, M., Theodoras, A.M., Schumacher, J., Roberts, J.M., Pagano, M., 1995. *Mol. Cell.*
- 667 *Biol.* 15, 2612–2624.



- 668 O’Neil, J., Grim, J., Strack, P., Rao, S., Tibbitts, D., Winter, C., Hardwick, J., Welcker, M.,  
669 Meijerink, J.P., Pieters, R., Draetta, G., Sears, R., Clurman, B.E., Look, A.T., 2007. *J.*  
670 *Exp. Med.* 204, 1813–1824.
- 671 Orlicky, S., Tang, X., Willems, A., Tyers, M., Sicheri, F., 2003. *Cell* 112, 243–256.
- 672 Perez-Roger, I., Kim, S.H., Griffiths, B., Sewing, A., Land, H., 1999. *EMBO J.* 18, 5310–5320.
- 673 Rajagopalan, H., Jallepalli, P.V., Rago, C., Velculescu, V.E., Kinzler, K.W., Vogelstein, B.,  
674 Lengauer, C., 2004. *Nature* 428, 77–81.
- 675 Redon, R., Hussenet, T., Bour, G., Caulee, K., Jost, B., Muller, D., Abecassis, J., Manoir, S. du,  
676 2002. *Cancer Res.* 62, 6211–6217.
- 677 Redon, R., Muller, D., Caulee, K., Wanherdrick, K., Abecassis, J., Manoir, S. du, 2001. *Cancer*  
678 *Res.* 61, 4122–4129.
- 679 Reed, S.E., Spruck, C.H., Sangfelt, O., Drogen, F. van, Mueller-Holzner, E., Widschwendter, M.,  
680 Zetterberg, A., Reed, S.I., 2004. *Cancer Res.* 64, 795–800.
- 681 Renshaw, M.J., Panagiotou, T.C., Lavoie, B.D., Wilde, A., 2019. *J. Biol. Chem.* 294, 18639–  
682 18649.
- 683 Spruck, C.H., Won, K.-A., Reed, S.I., 1999. *Nature* 401, 297–300.
- 684 Steinhart, Z., Pavlovic, Z., Chandrashekar, M., Hart, T., Wang, X., Zhang, X., Robitaille, M.,  
685 Brown, K.R., Jaksani, S., Overmeer, R., Boj, S.F., Adams, J., Pan, J., Clevers, H.,  
686 Sidhu, S., Moffat, J., Angers, S., 2017. *Nat. Med.* 23, 60–68.
- 687 Sticht, C., Hofele, C., Flechtenmacher, C., Bosch, F.X., Freier, K., Lichter, P., Joos, S., 2005.  
688 *Br. J. Cancer* 92, 770–774.
- 689 Su, Y., Fu, C., Ishikawa, S., Stella, A., Kojima, M., Shitoh, K., Schreiber, E.M., Day, B.W., Liu,  
690 B., 2008. *Mol. Cell* 32, 652–661.
- 691 Takada, M., Zhang, W., Suzuki, A., Kuroda, T.S., Yu, Z., Inuzuka, H., Gao, D., Wan, L., Zhuang,  
692 M., Hu, L., Zhai, B., Fry, C.J., Bloom, K., Li, G., Karpen, G.H., Wei, W., Zhang, Q., 2017.  
693 *Cancer Res.* 77, 4881–4893.
- 694 Tang, X., Orlicky, S., Lin, Z., Willems, A., Neculai, D., Ceccarelli, D., Mercurio, F., Shilton, B.H.,  
695 Sicheri, F., Tyers, M., 2007. *Cell* 129, 1165–1176.
- 696 Tetzlaff, M.T., Yu, W., Li, M., Zhang, P., Finegold, M., Mahon, K., Harper, J.W., Schwartz, R.J.,  
697 Elledge, S.J., 2004. *Proc. Natl. Acad. Sci. U. S. A.* 101, 3338–3345.
- 698 Van Rechem, C., Black, J.C., Abbas, T., Allen, A., Rinehart, C.A., Yuan, G.-C., Dutta, A.,  
699 Whetstine, J.R., 2011. *J. Biol. Chem.* 286, 30462–30470.
- 700 Wei, W., Jin, J., Schlisio, S., Harper, J.W., Kaelin, W.G., 2005. *Cancer Cell* 8, 25–33.
- 701 Welcker, M., Clurman, B.E., 2008. *Nat. Rev. Cancer* 8, 83–93.
- 702 Welcker, M., Orian, A., Grim, J.E., Grim, J.A., Eisenman, R.N., Clurman, B.E., 2004a. *Curr. Biol.*  
703 *CB* 14, 1852–1857.
- 704 Welcker, M., Orian, A., Jin, J., Grim, J.E., Grim, J.A., Harper, J.W., Eisenman, R.N., Clurman,  
705 B.E., 2004b. *Proc. Natl. Acad. Sci. U. S. A.* 101, 9085–9090.
- 706 Yeh, C.-H., Bellon, M., Nicot, C., 2018. *Mol. Cancer* 17, 115.

707  
708  
709  
710  
711  
712  
713  
714  
715  
716

717 **Figure Legends**

718

719 **Figure 1. *FBXW7* loss-of-function bypasses requirement for autocrine Wnt signaling in**  
720 **Wnt-addicted PDAC cells.**

721 A HPAF-II cells contain an autocrine Wnt signaling loop, where Wnt secreted by cells is required  
722 for the cells to grow. Treatment with the Porcupine (PORCN) inhibitor LGK974 (which inhibits  
723 Wnt secretion) leads to cell cycle arrest.

724 B Clonogenic growth assay in control HPAF-II cells or in cells treated with 150nM LGK974 for  
725 10 days; representative of three independent replicates.

726 C Schematic representation of the positive selection screen conducted to identify genes  
727 involved in LGK974 sensitivity.

728 D Volcano plot with results of the positive selection screen identifying *FBXW7* along with *AXIN1*,  
729 *CSNK1A1*, and *APC* as genes overcoming LGK974-induced cell cycle arrest when knocked out.

730 E Schematic representation of *FBXW7*<sup>-/-</sup> and *APC*<sup>-/-</sup> cell line generation in HPAF-II using  
731 LGK974 treatment to enrich edited cells.

732 F Clonogenic growth assay of indicated HPAF-II cells left untreated or in the presence of 150nM  
733 LGK974 for 10 days; representative of three independent replicates. Quantification of n=3  
734 biological replicates, one-way ANOVA.

735 G Immunoblot of cytoplasmic  $\beta$ catenin expression from lysates of HPAF-II cells from indicated  
736 genotype, treated with vehicle or 100nM LGK974 for 48h; representative of three biological  
737 replicates.

738

739 **Figure 2. Genome-wide CRISPR screen performed in isogenic wild-type and *FBXW7*<sup>-/-</sup>**  
740 **HPAF-II cells identifies a synthetic lethal genetic interaction.**

741 A Schematic representation of genome-wide CRISPR-Cas9 dropout screens performed in  
742 isogenic wild-type and *FBXW7*<sup>-/-</sup> HPAF-II cell lines.

743 B Differential Bayes Factor Z-score plot comparing wild-type and *FBXW7*<sup>-/-</sup> genome-wide  
744 dropout screens.

745 C Fold-change abundance of individual sgRNA targeting *CCNL1* during the genome-wide  
746 dropout screens from day 0 to day 24, n=3 technical replicates per sgRNA, mean  $\pm$  SEM.

747 D Multicolour-competition assay in both wild-type and *FBXW7*<sup>-/-</sup> cell lines, using mCherry-  
748 AAVS1 and GFP-GOI, normalized to AAVS1 control cells at each time-point (n=3 independent  
749 replicates), mean  $\pm$  SEM, one-way ANOVA.

750 E Proliferation assays in wildtype and *FBXW7*<sup>-/-</sup> cell lines show that knockout of *CCNL1*  
751 preferentially affects *FBXW7*<sup>-/-</sup> cells, normalized to AAVS1 control (n=3 independent replicates),  
752 mean  $\pm$  SEM, one-way ANOVA

753

754 **Figure 3. *CCNL1* protein stability is mediated by SCF<sup>*FBXW7*</sup>.**

755 A Immunoblot of *CCNL1* and *FBXW7* expression in HPAF-II wild-type and *FBXW7*<sup>-/-</sup> cells,  
756 representative blot of 3 independent replicates.

757 B Immunoblot of *CCNL1* expression following a cycloheximide chase in HPAF-II wild-type and  
758 *FBXW7*<sup>-/-</sup> cells, representative blot of 3 independent replicates.

759 C Quantification of cycloheximide chase in B, mean  $\pm$  SEM of three independent replicates.  
760 Two-way ANOVA at T8.

761 D Immunoblot of CCNL1 expression in HPAF-II wild-type and dN-Cul1 expressing cells,  
762 representative blot of 3 independent replicates.  
763 E Sequence alignment of well-characterized CPD degron motifs, and identification of potential  
764 FBXW7 phosphodegron motif in a conserved region of CCNL1.  
765 F Fluorescence polarization assay of CCNL1 and cyclin E peptides binding FBXW7-Skp1  
766 complex, three independent replicates, mean  $\pm$  SEM.  
767 G Immunoblot of lysates following cycloheximide treatment of HEK293T cells expressing wild-  
768 type or degron-mutated CCNL1, representative blot of 3 independent replicates.  
769 H Quantification of cycloheximide chase in G, mean  $\pm$  SEM of three independent replicates.  
770 Two-way ANOVA at T8.

771

772 **Figure 4. FBXW7 is involved in the ubiquitination of CCNL1**

773 A Immunoblot of immunoprecipitation of FLAG-FBXW7 overexpressed in HEK293T cells,  
774 detecting endogenous CCNL1. Representative of three independent replicates.  
775 B Immunoblot of immunoprecipitation of FLAG-CCNL1 overexpressed in HEK293T cells,  
776 detecting endogenous FBXW7. Representative of three independent replicates.  
777 C Immunoblot of cellular ubiquitination assay demonstrating the requirement of the 325-TPALS-  
778 329 degron for ubiquitination of CCNL1. Representative of three independent replicates.  
779 D Immunoblot of cellular ubiquitination assay demonstrating the requirement of FBXW7 for  
780 ubiquitination of CCNL1. Representative of three independent replicates.  
781 E Immunoblot of cellular ubiquitination assay showing re-expression of FBXW7 in knockout cells  
782 leads to increased CCNL1 ubiquitination. Representative of three independent replicates.

783

784 **Figure 5. CCNL1 regulates mitotic timing.**

785 A Cell cycle profile of nocodazole treated and released HPAF-II wild-type and *FBXW7*<sup>-/-</sup> cells  
786 measured by flow cytometry, n=3 independent replicates, mean $\pm$  SEM.  
787 B Immunoblot of HPAF-II wild-type and *FBXW7*<sup>-/-</sup> released from overnight nocodazole treatment  
788 at indicated time points, representative of 3 independent replicates  
789 C Representative cell cycle profile of HPAF-II wild-type, *FBXW7*<sup>-/-</sup>, and *CCNL1*<sup>OE</sup> cells stained  
790 with propidium iodide, with quantification of G2-M phase. Three independent replicates, mean  $\pm$   
791 SEM, one-way ANOVA.  
792 D Representative images of GFP-tubulin labeled wild-type, *FBXW7*<sup>-/-</sup>, and *CCNL1*<sup>OE</sup> HPAF-II  
793 cells monitoring cellular progression through cytokinesis following arrest in prometaphase using  
794 monastrol (150 $\mu$ M for 18 hours). Arrows indicate tracked cell, 20 $\mu$ m scale bars  
795 E Quantification of cytokinetic timing, n=20, 25, 26 (wild-type, *FBXW7*<sup>-/-</sup>, *CCNL1*<sup>OE</sup>) pooled from  
796 three independent experiments, one-way ANOVA.  
797 F Immunoblot of wild-type, *FBXW7*<sup>-/-</sup> and *CCNL1*<sup>OE</sup> HPAF-II cell lines demonstrating varying  
798 levels of CCNL1.  
799 G Cell cycle profiles of wild-type, *FBXW7*<sup>-/-</sup> and *APC*<sup>-/-</sup> HPAF-II cells following treatment with  
800 500nM LGK974 for 24 hours. Representative images of 3 replicates, mean  $\pm$  SEM, 2-way  
801 ANOVA, \*p=0.044, \*\*\*p<0.001.

802

803 **Figure 6. Cells harboring *FBXW7*-LOF mutations or *CCNL1* overexpression are highly**  
804 **sensitive to CDK11 inhibitor, OTS964.**

805 A Clonogenic growth assays for HPAF-II wild-type and *FBXW7*<sup>-/-</sup> polyclonal, and *FBXW7*<sup>-/-</sup>  
806 clones in presence of various OTS964 doses for 14 days. Representative images of 4  
807 independent replicates, quantified by crystal violet absorbance at A595 and plotted mean ±  
808 SEM.  
809 B Clonogenic growth assays for HPAF-II wild-type and *CCNL1*<sup>OE</sup> polyclonal, and *CCNL1*<sup>OE</sup>  
810 clones in presence of various doses of OTS964 for 14 days. Representative images of 4  
811 independent replicates, quantified by crystal violet absorbance at A595 and plotted mean ±  
812 SEM.  
813 C Immunoblot for the indicated proteins from lysates extracted from the individual *FBXW7*<sup>-/-</sup> and  
814 *CCNL1*<sup>OE</sup> clones.  
815 D Cell cycle distribution plots with and without 24h OTS964 treatment, representative of 4  
816 independent replicates. Normalized to untreated, mean ± SEM, one-way ANOVA.

817

818 **Figure 7. Cervical cancer cell lines exhibit differential sensitivity to OTS964 depending on**  
819 ***FBXW7* mutational status.**

820 A Oncoprint from cBioPortal demonstrates mutual exclusivity between *FBXW7* and *CCNL1*  
821 alterations

822 B Immunoblot of lysates from cervical cell lines demonstrating C33A cells (*FBXW7*<sup>R465H</sup>)  
823 express high levels of CCNL1, representative of three independent replicates.

824 C Clonogenic growth assay of C33A, Caski, and SiHa cells in presence of various doses of  
825 OTS964 for 14 days. Representative images of 3 independent replicates, quantified by crystal  
826 violet absorbance at A595 and plotted mean ± SEM.

827 D Cell cycle distribution plots with and without 24h OTS964 treatment, representative of 3  
828 independent replicates. Normalized to untreated, mean ± SEM, one-way ANOVA.

829 E Model of proposed mechanism.

830

831 **Expanded View**

832 **EV Figure 1**

833 A TIDE analysis of HPAF-II *FBXW7*<sup>-/-</sup> cell line and HPAF-II *APC*<sup>-/-</sup> cell line.

834 B Immunoblot of lysates extracted from HPAF-II *FBXW7*<sup>-/-</sup> cell lines demonstrating knockout of  
835 *FBXW7* protein expression.

836 C Fold-change plots of HPAF-II wild-type and *FBXW7*<sup>-/-</sup> genome-wide screens demonstrating  
837 change in essential genes at T24 of screen.

838 D Precision-recall curves of HPAF-II wild-type and *FBXW7*<sup>-/-</sup> genome-wide screens  
839 demonstrating training sets of essential and non-essential genes performed appropriately in the  
840 BAGEL algorithm.

841 E Immunoblot of lysates extracted from *FBXW7*<sup>-/-</sup> cells following treatment with sgRNAs  
842 targeting *CCNL1*.

843

844 **EV Figure 2:**

845 A Quantification of immunoblots in Figure 3A, mean ± SEM, students t-test.

846 B Quantification of immunoblots in Figure 3D, mean ± SEM, students t-test.

847 C Immunoblot analysis of HEK293T cells expressing sgRNAs against *AAVS1* or *FBXW7*.

848 D TIDE analysis of HEK293T cells expressing sgRNAs against *AAVS1* or *FBXW7*.

849 E Immunoblot of immunoprecipitation of FLAG-CCNL1 overexpressed in HPAF-II cells,  
850 detecting endogenous Cul1 and Cul4A. Representative image of three independent replicates.  
851 F Immunoblot of lysates following cycloheximide treatment of HEK293T cells expressing HA-  
852 CCNL1 and FLAG-FBXW7 or FLAG-FBXW7<sup>R465C</sup>. Representative blot of three independent  
853 replicates  
854 G Quantification of cycloheximide chase in F, mean  $\pm$  SEM of three independent replicates, t-  
855 test at T6.

856  
857 **EV Figure 3:**

858 A Representative images of gating strategy for HPAF-II wild-type, *FBXW7*<sup>-/-</sup> and *CCNL1*<sup>1<sup>OE</sup></sup> cells  
859 to determine cell cycle distribution.  
860 B Schematic of PIP-FUCCI reporter marker expression through 3 major cell cycle phases.  
861 C Live-cell imaging of HPAF-II wild-type, *FBXW7*<sup>-/-</sup> and *CCNL1*<sup>1<sup>OE</sup></sup> cells expressing PIP-FUCCI  
862 reporter treated with nocodazole overnight and released. Images collected over 3.5 hours.  
863 Reduction in total population mCherry expression imaged over time, quantified in the Incucyte.  
864 Three independent replicates, mean  $\pm$  SEM, two-way ANOVA.  
865 D Live-cell imaging of HPAF-II wild-type, *FBXW7*<sup>-/-</sup> and *CCNL1*<sup>1<sup>OE</sup></sup> cells expressing PIP-FUCCI  
866 reporter either untreated or treated with nocodazole overnight and released. Measurement of  
867 individual cells as they lose mCherry expression. n=15 cells per replicate, three independent  
868 replicates, one-way ANOVA.

869  
870 **EV Figure 4:**

871 A Representative gating strategy for HPAF-II wild-type, *FBXW7*<sup>-/-</sup> and *APC*<sup>-/-</sup> cells, with and  
872 without LGK974 treatment, to determine cell cycle distribution.  
873 B Representative gating strategy for HPAF-II wild-type, *FBXW7*<sup>-/-</sup> and *CCNL1*<sup>1<sup>OE</sup></sup> cells, with and  
874 without OTS964 treatment, to determine cell cycle distribution.  
875 C Representative images of gating strategy for C33A, Caski and SiHa cells, with and without  
876 OTS964 treatment, to determine cell cycle distribution  
877 D Normalized Z-score calculated in DrugZ plotted against gene rank for C33A chemogenomic  
878 screen with OTS964. Negative score indicates gene knockout synergistic with OTS964, positive  
879 scores indicates gene knockouts resistant to OTS964. Red line marks cutoff of FDR<0.05.

880  
881 **EV Movie 1.** Monastrol wash-out and completion of cytokinesis in GFP-tubulin labelled HPAF-II  
882 wild-type cells.

883 **EV Movie 2.** Monastrol wash-out and completion of cytokinesis in GFP-tubulin labelled HPAF-II  
884 *FBXW7*<sup>-/-</sup> cells.

885 **EV Movie 3.** Monastrol wash-out and completion of cytokinesis in GFP-tubulin labelled HPAF-II  
886 *CCNL1*<sup>1<sup>OE</sup></sup> cells.

887  
888 **EV File 1:** Raw read counts from HPAF-II LGK974 chemogenomic screen, Bayes Factors from  
889 HPAF-II wild-type and *FBXW7*<sup>-/-</sup> genome-wide fitness screens, and raw read counts from C33A  
890 cell line OTS964 chemogenomic screen.

891  
892



Figure 1

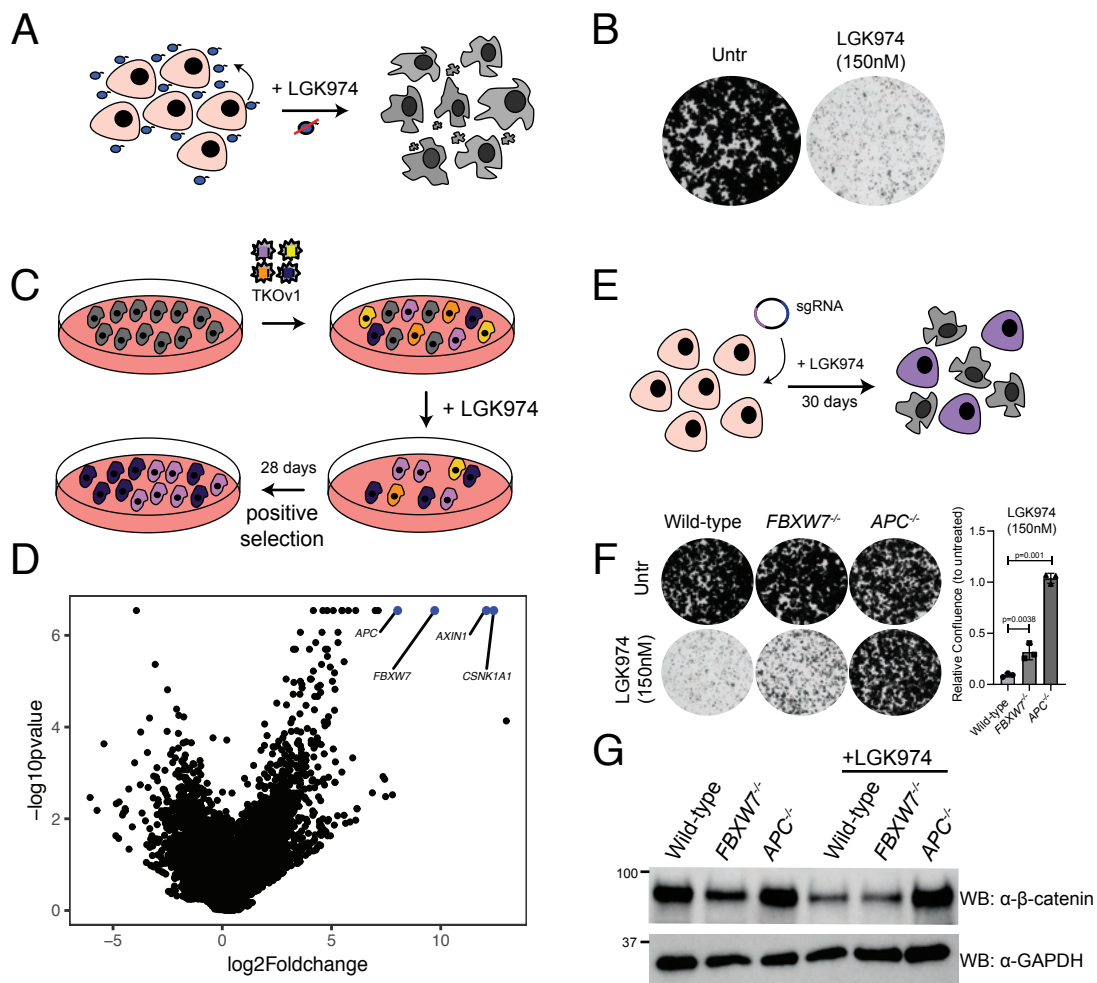

Figure 2

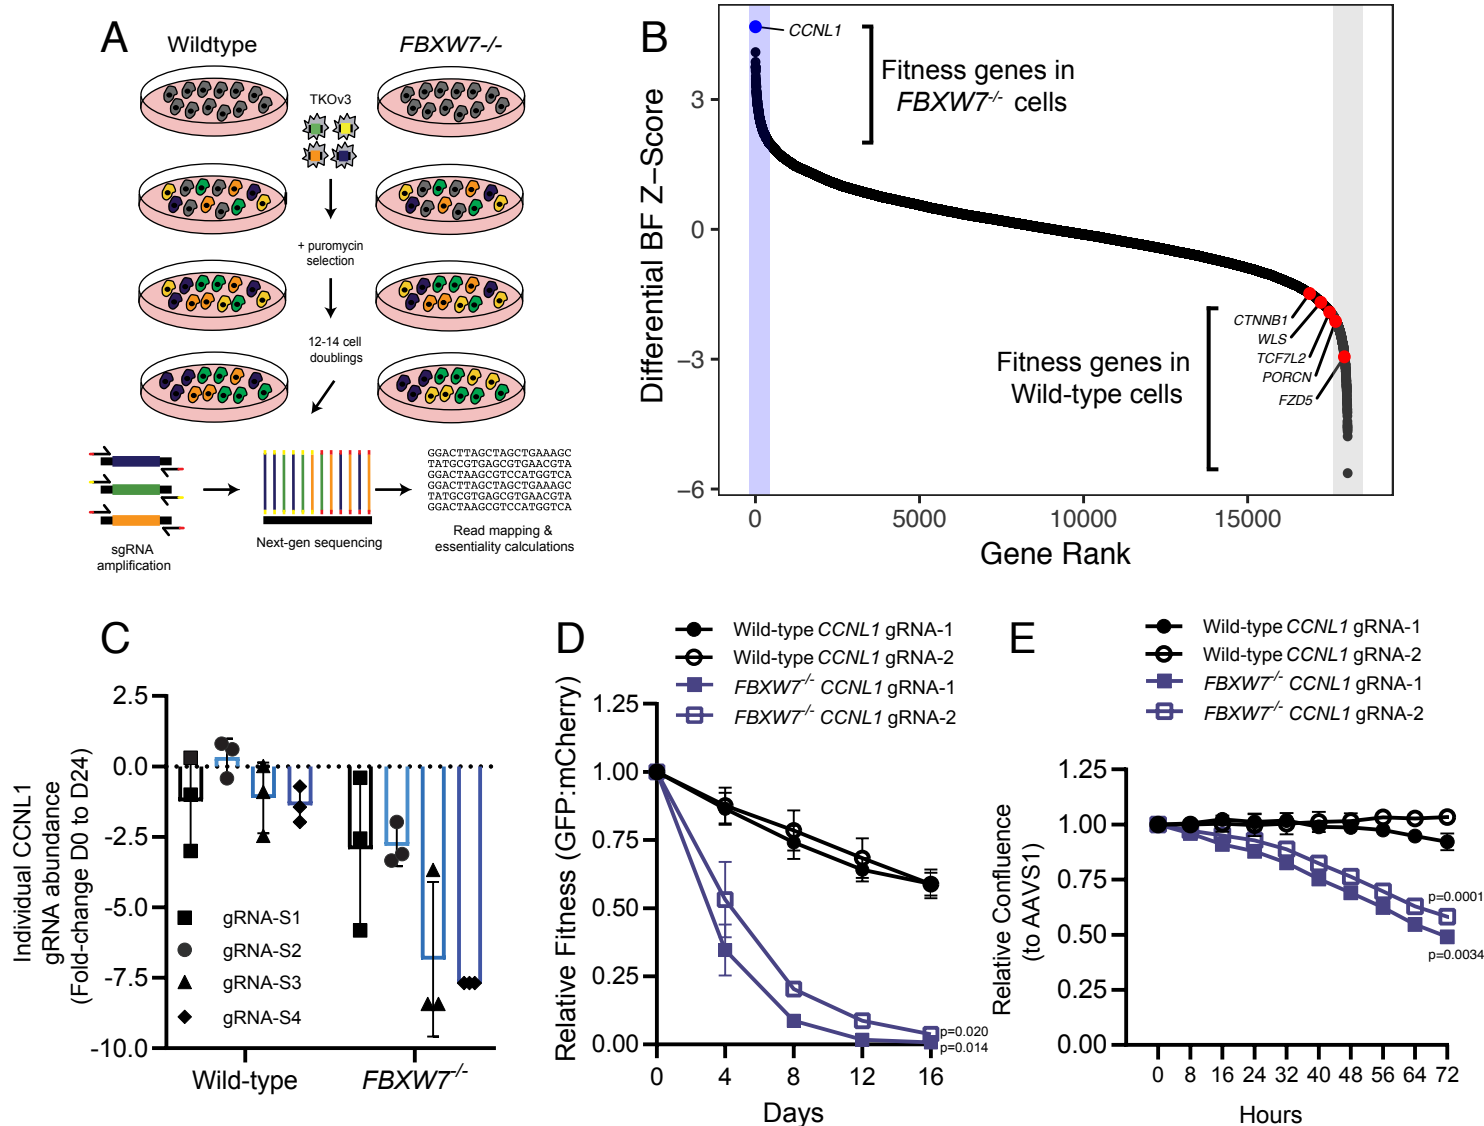



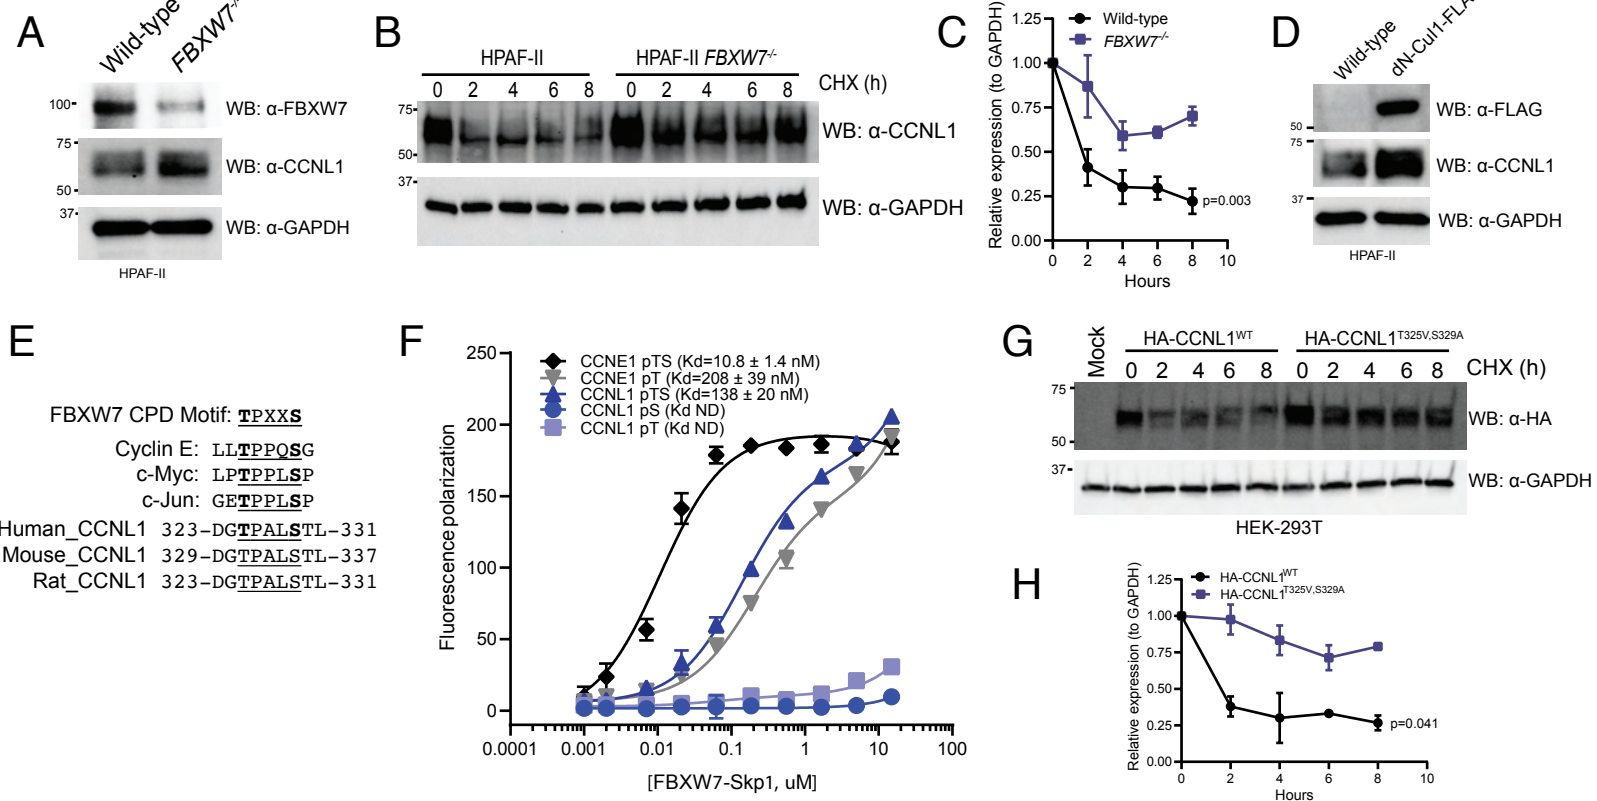

Figure 4

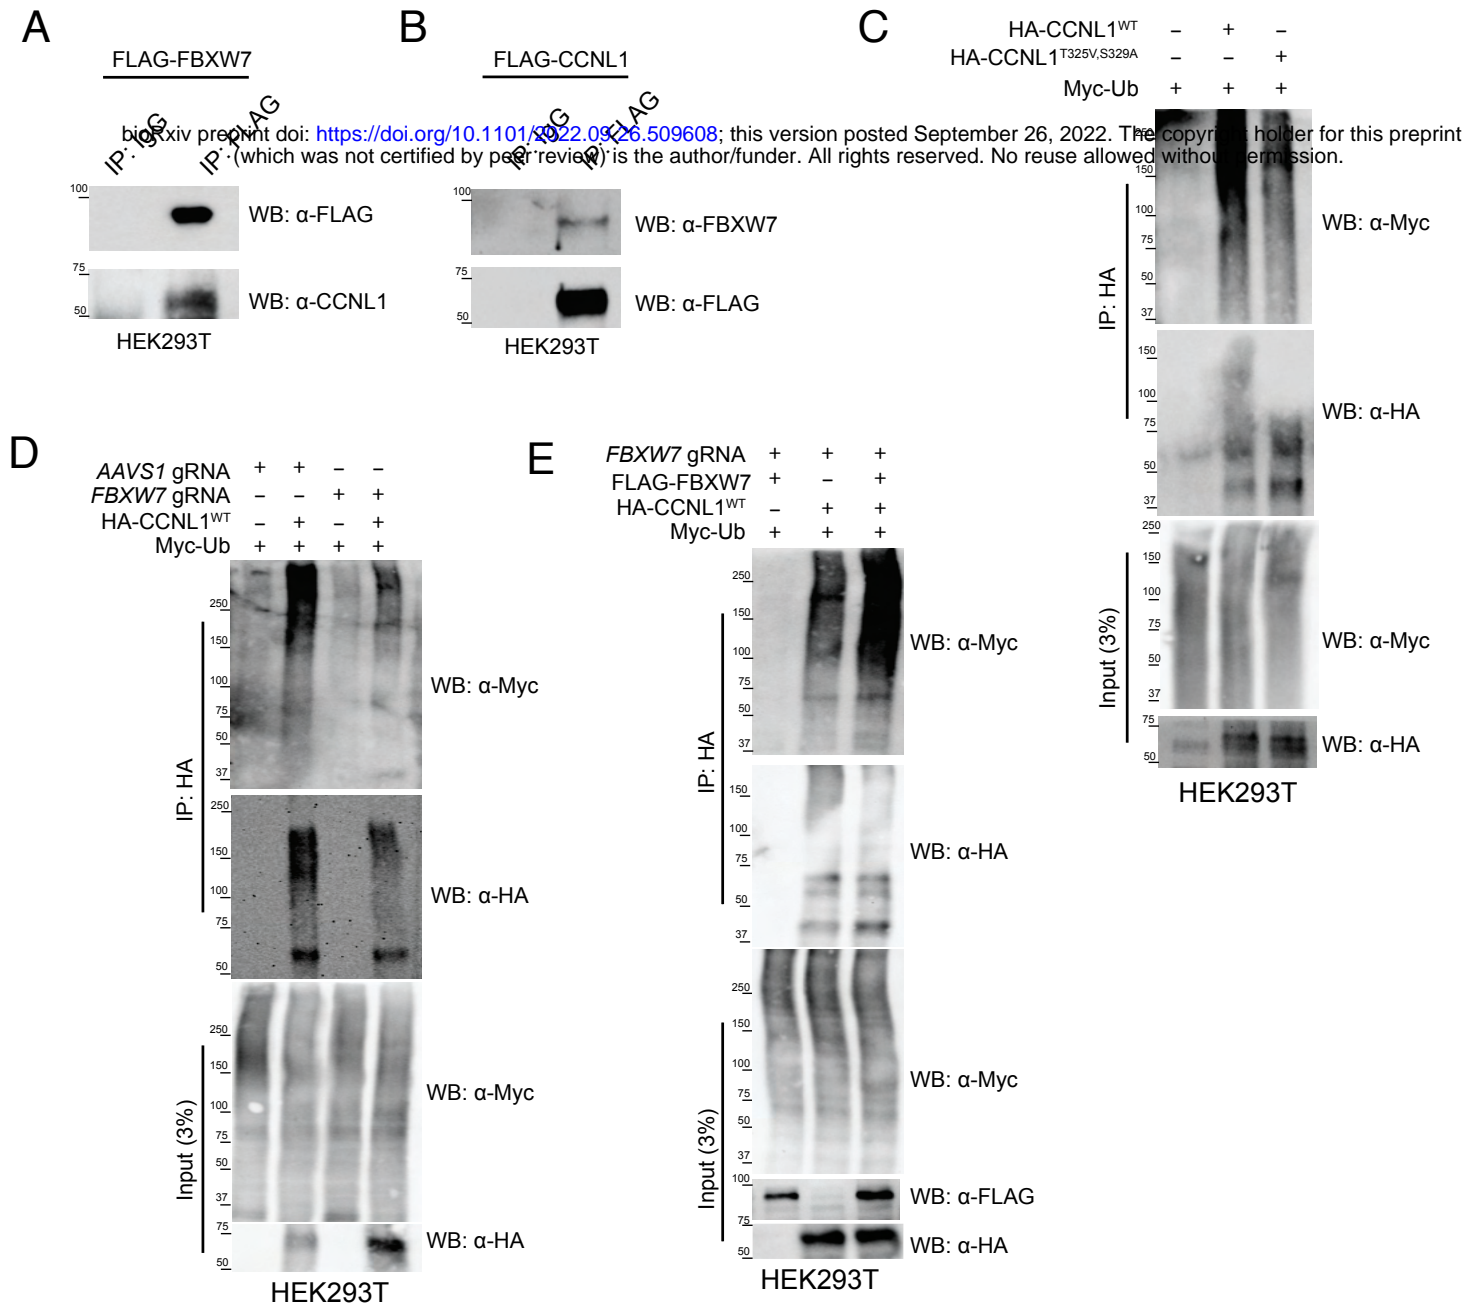

Figure 5

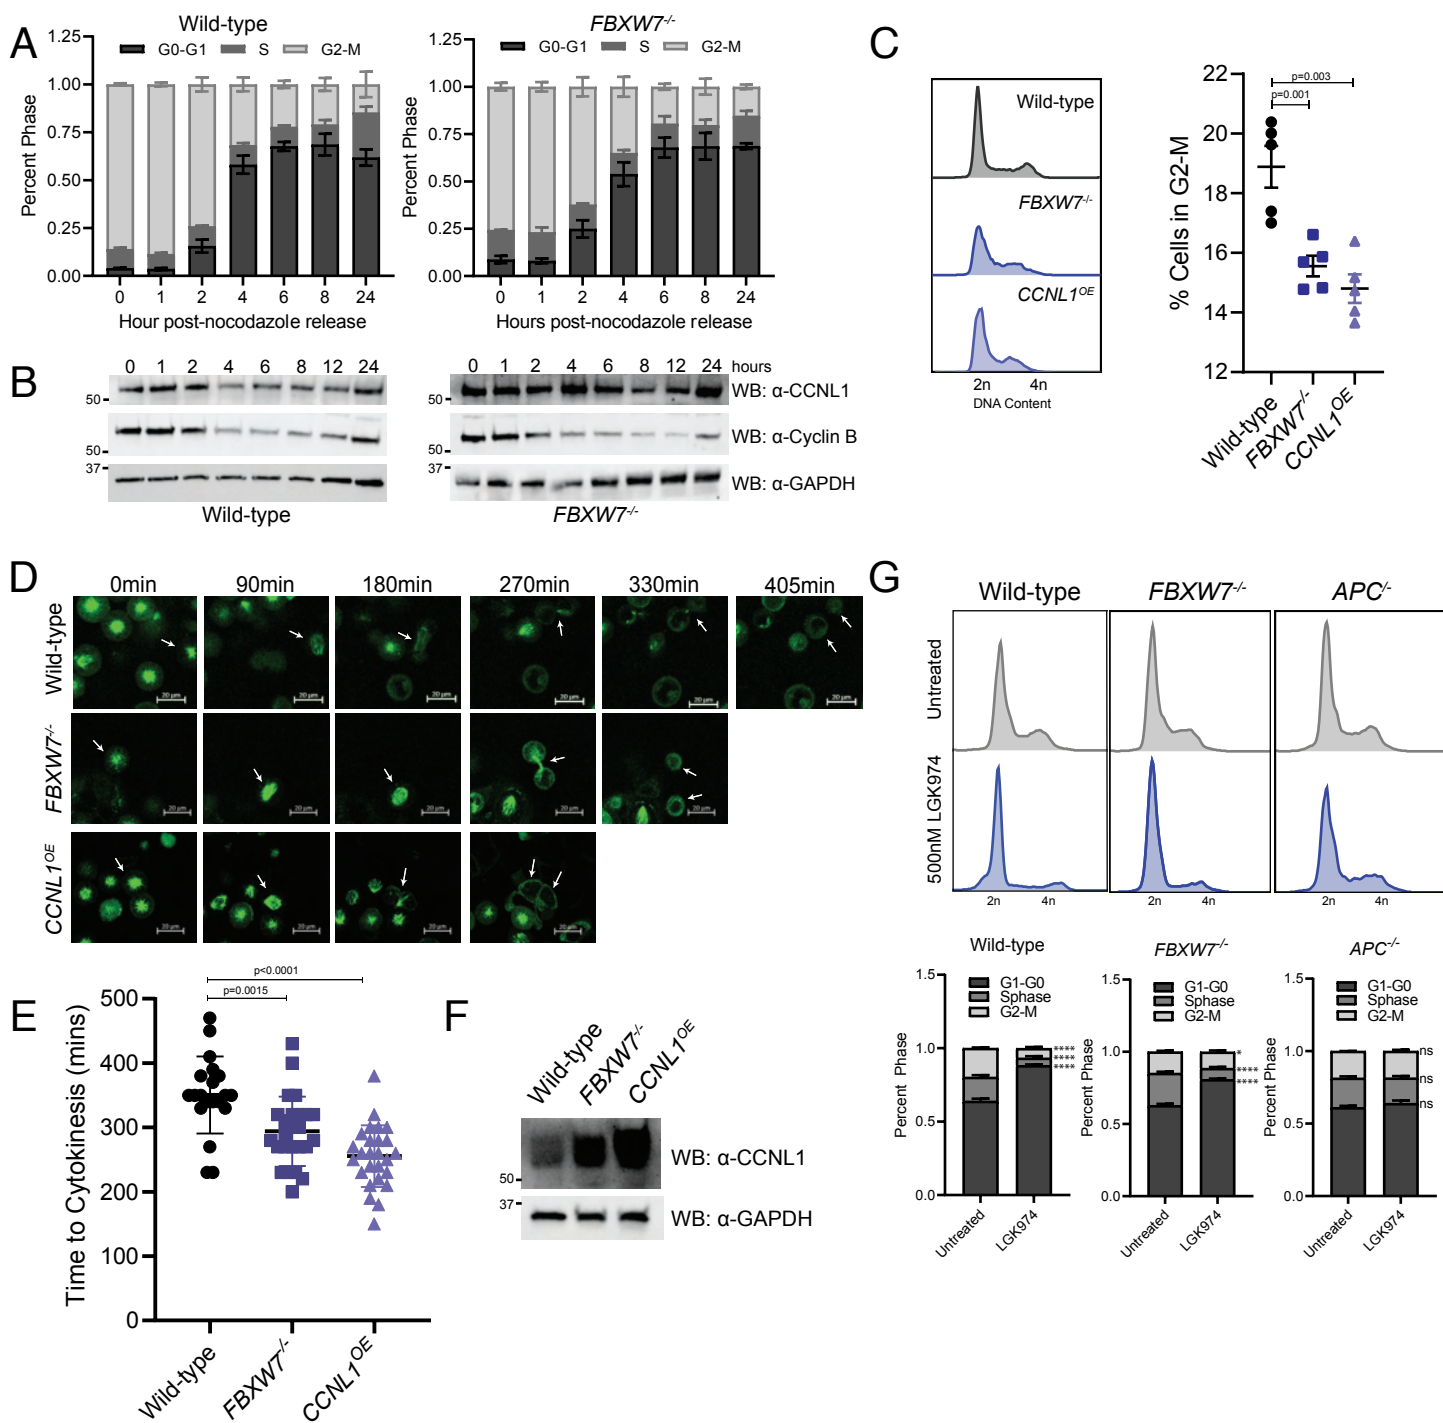

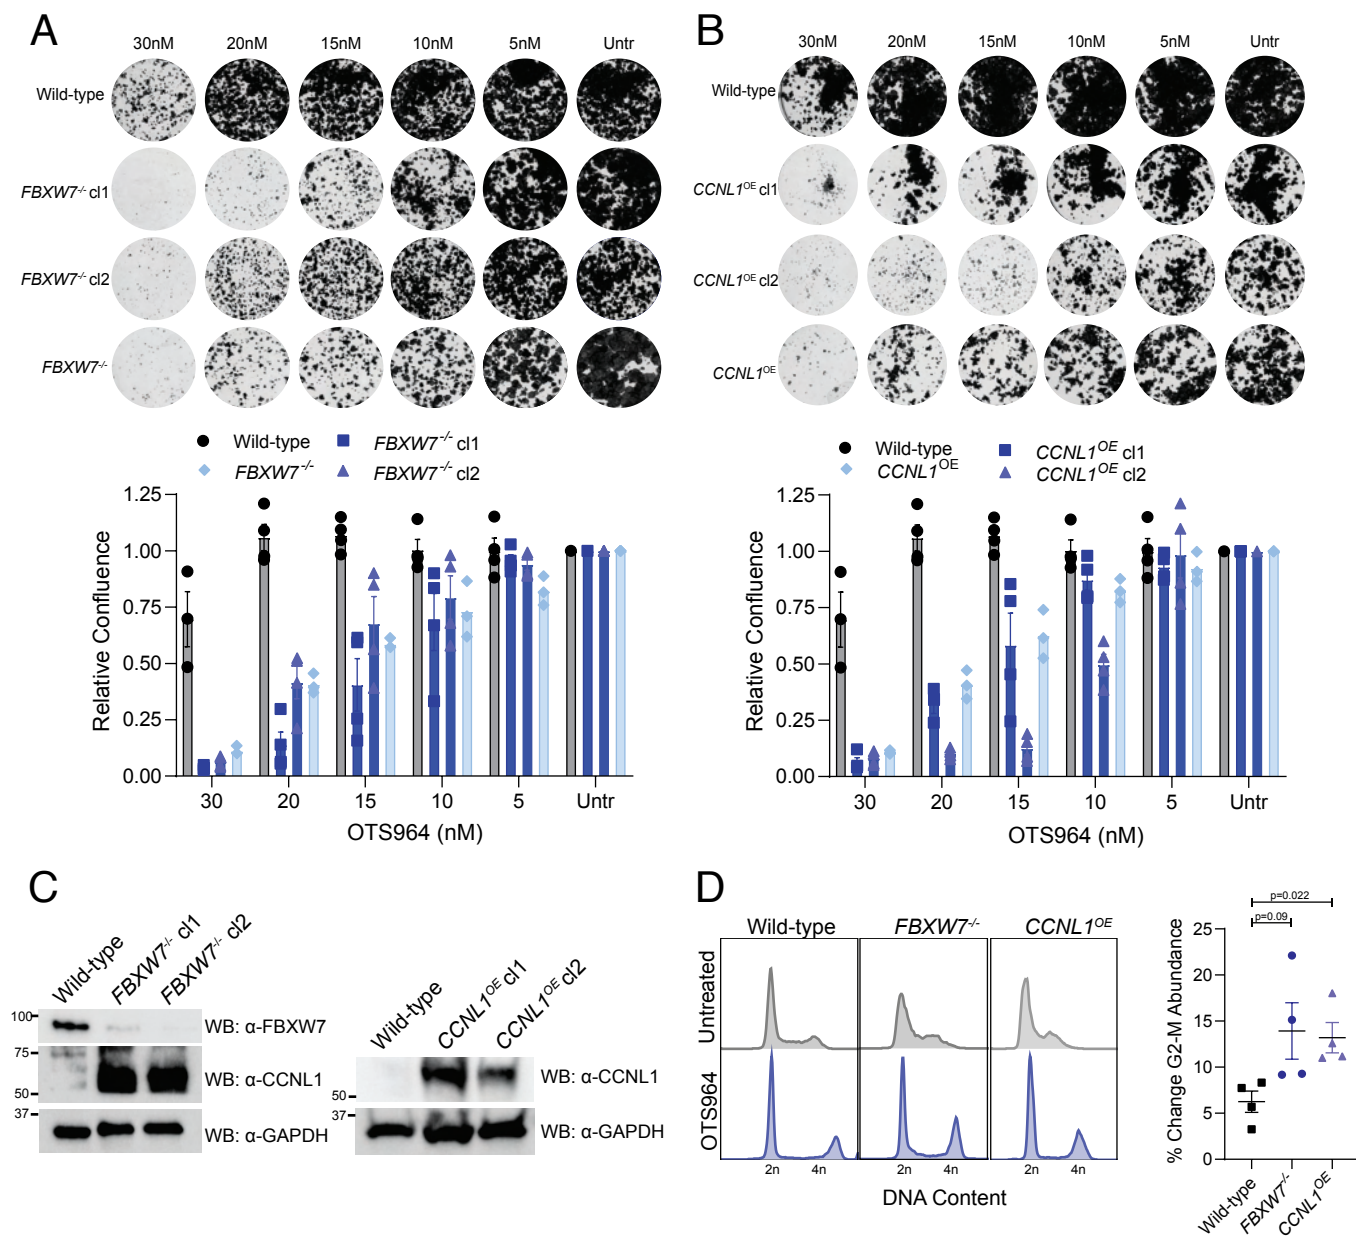

Figure 7

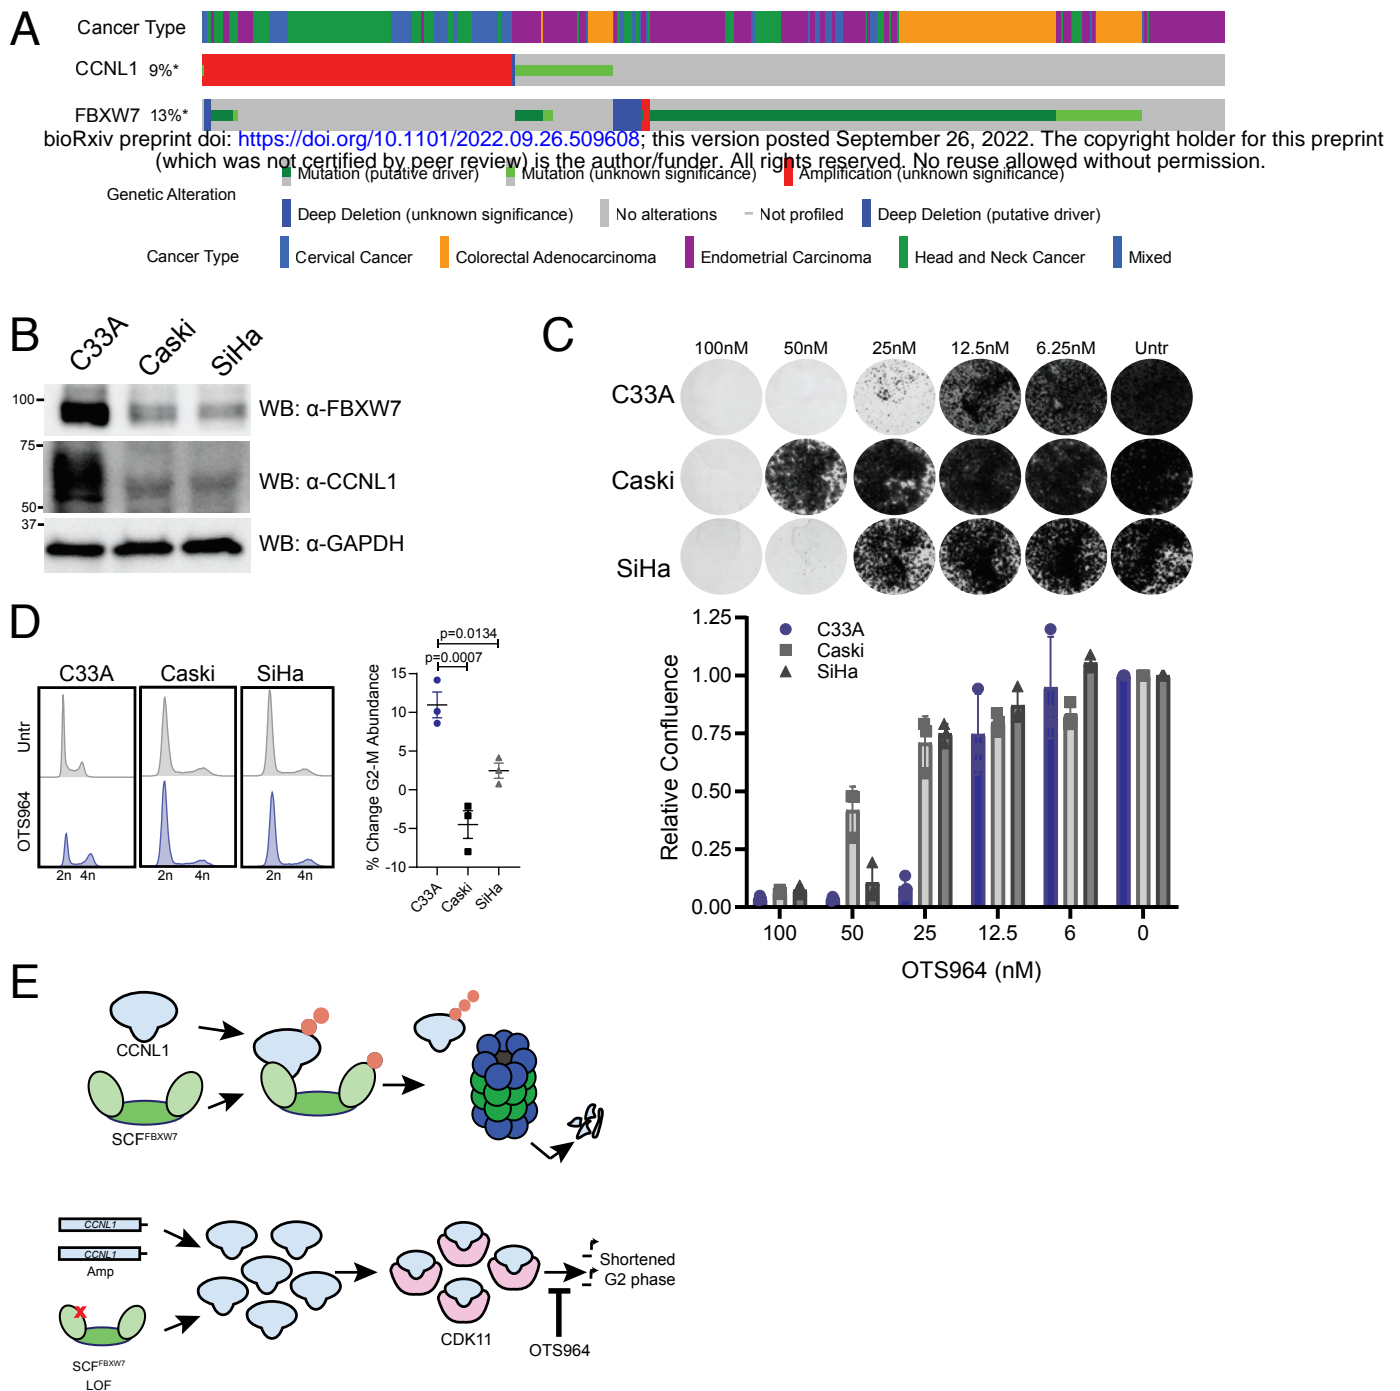

**A**

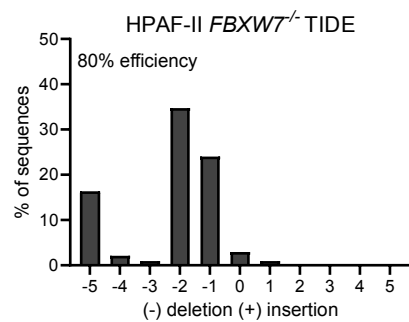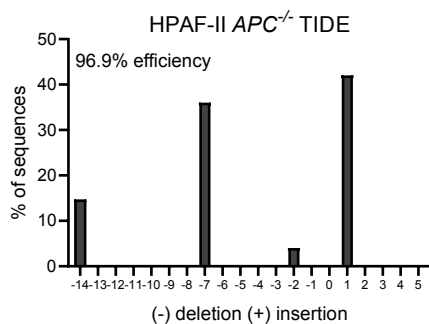

**B**

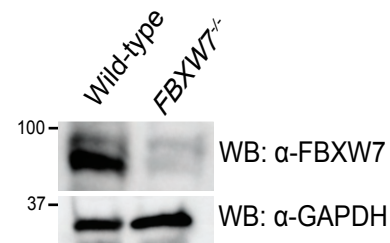

**C**

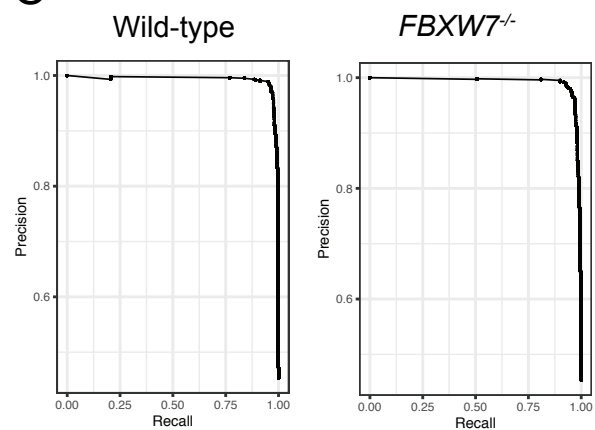

**D**

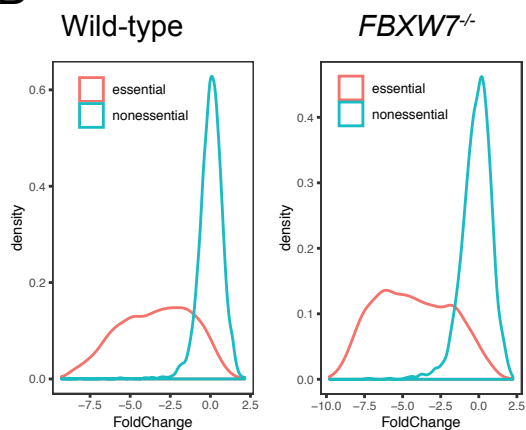

**E**

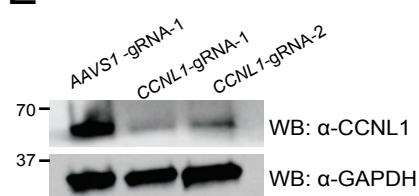

Figure EV2

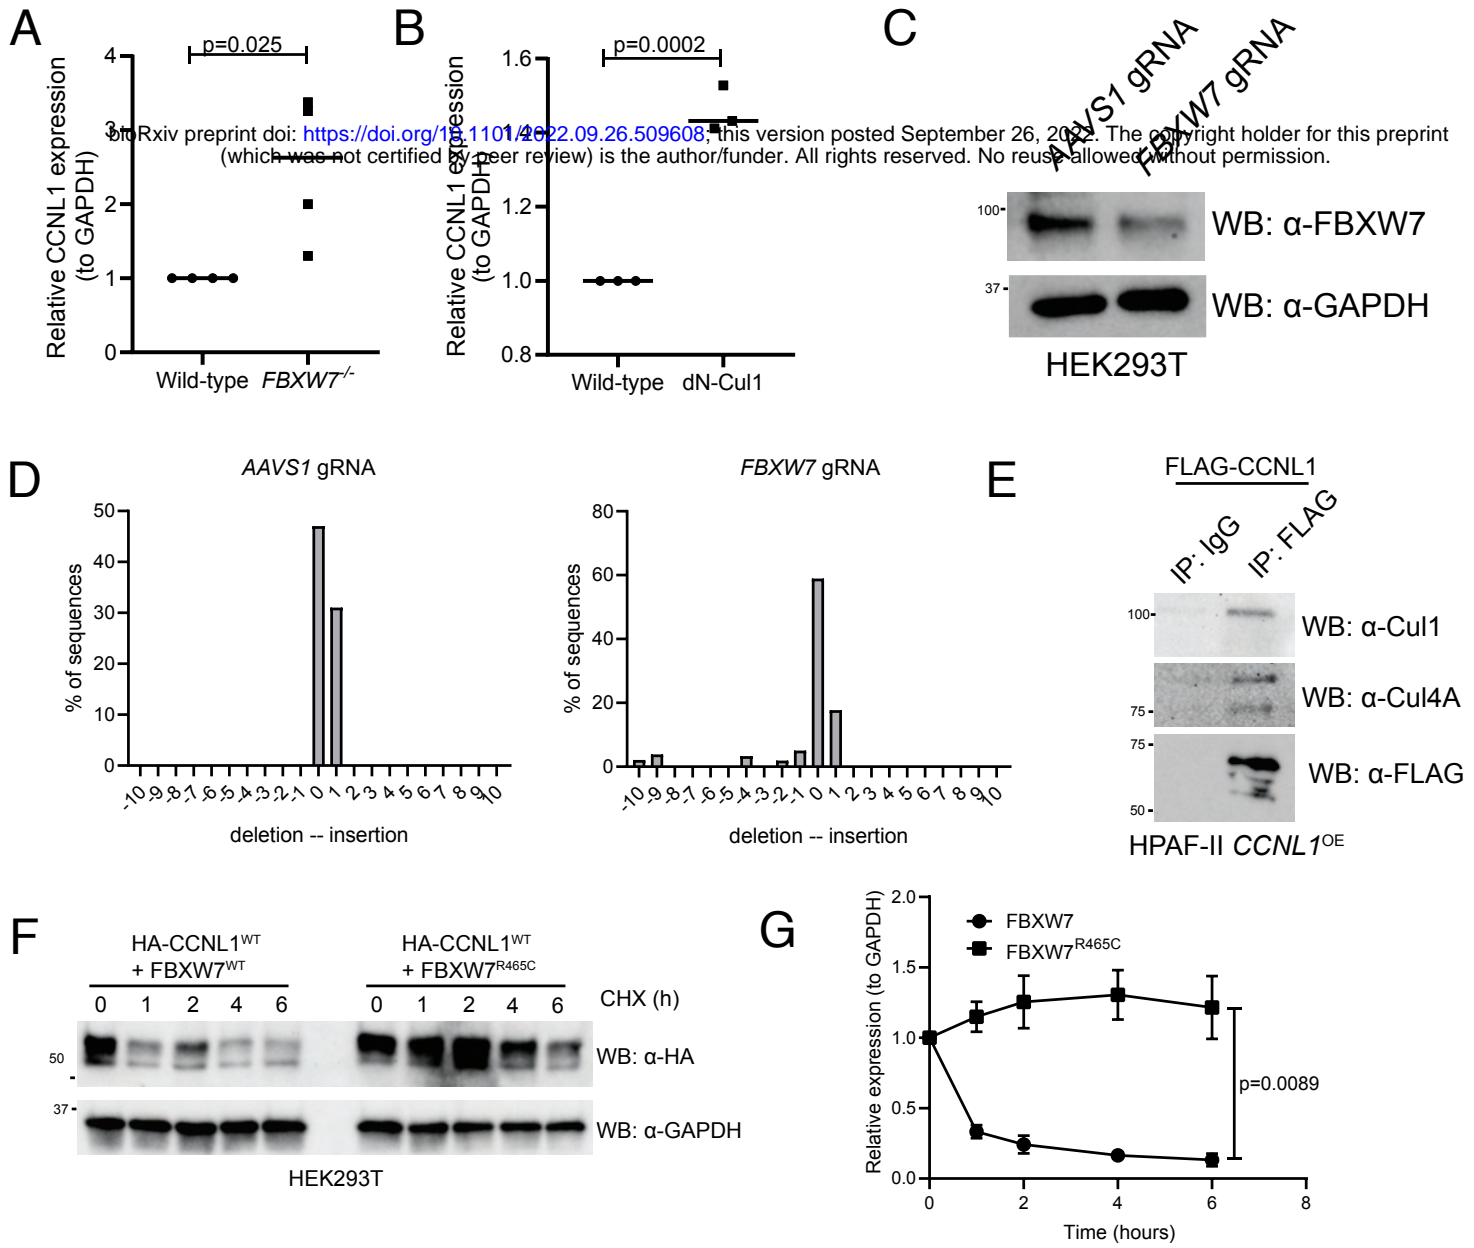

bioRxiv preprint doi: <https://doi.org/10.1101/2022.09.26.509608>; this version posted September 26, 2022. The copyright holder for this preprint (which was not certified by peer review) is the author/funder. All rights reserved. No reuse allowed without permission.

Figure EV3

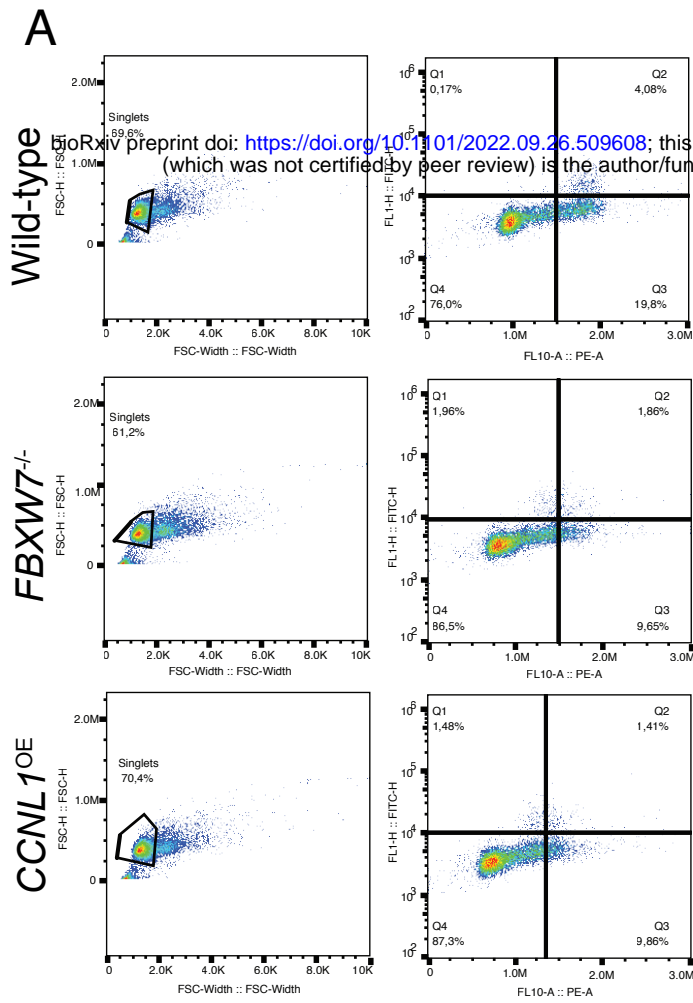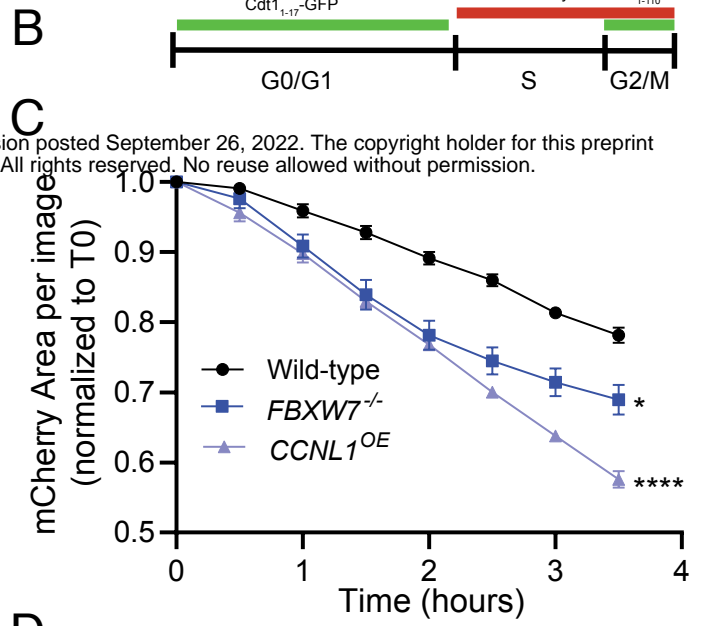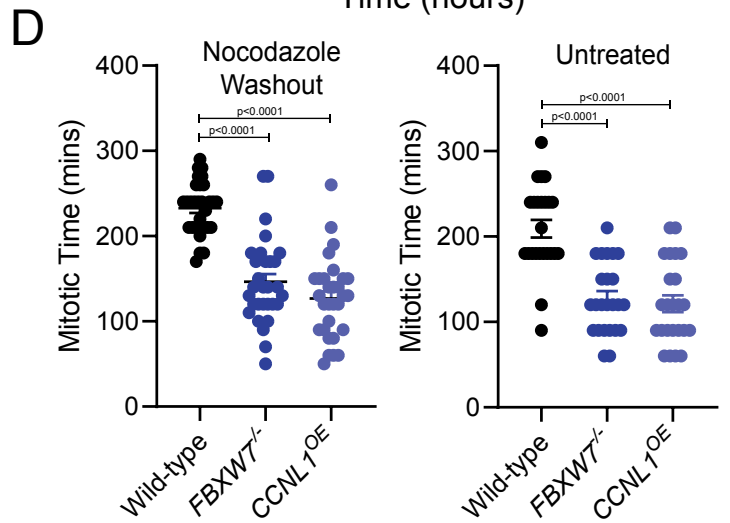



Figure EV4

A

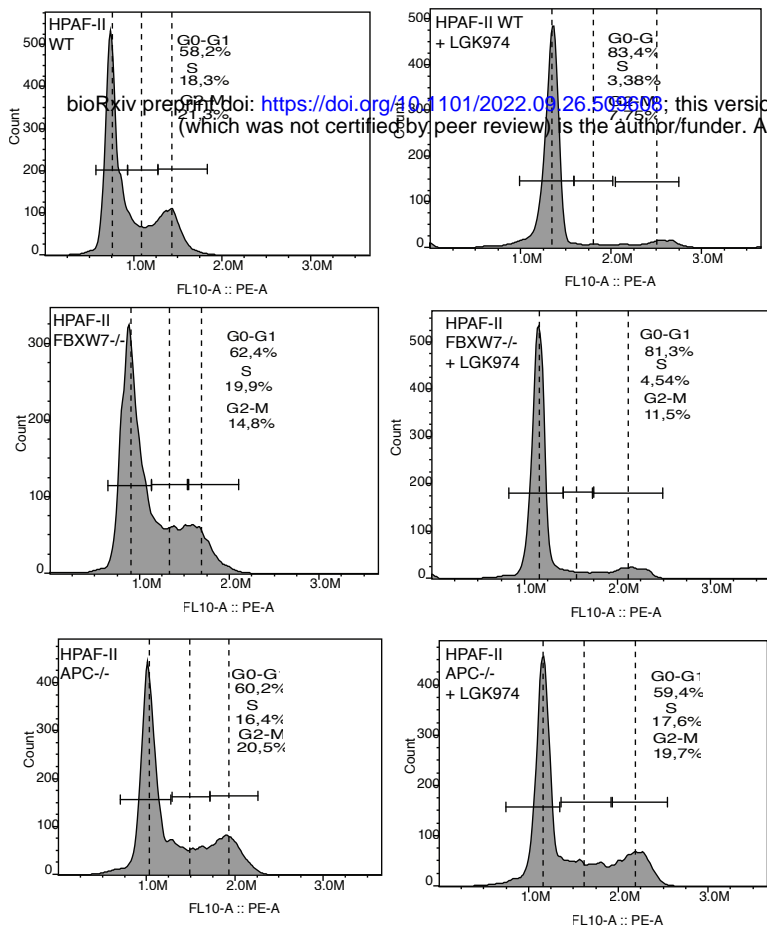

B

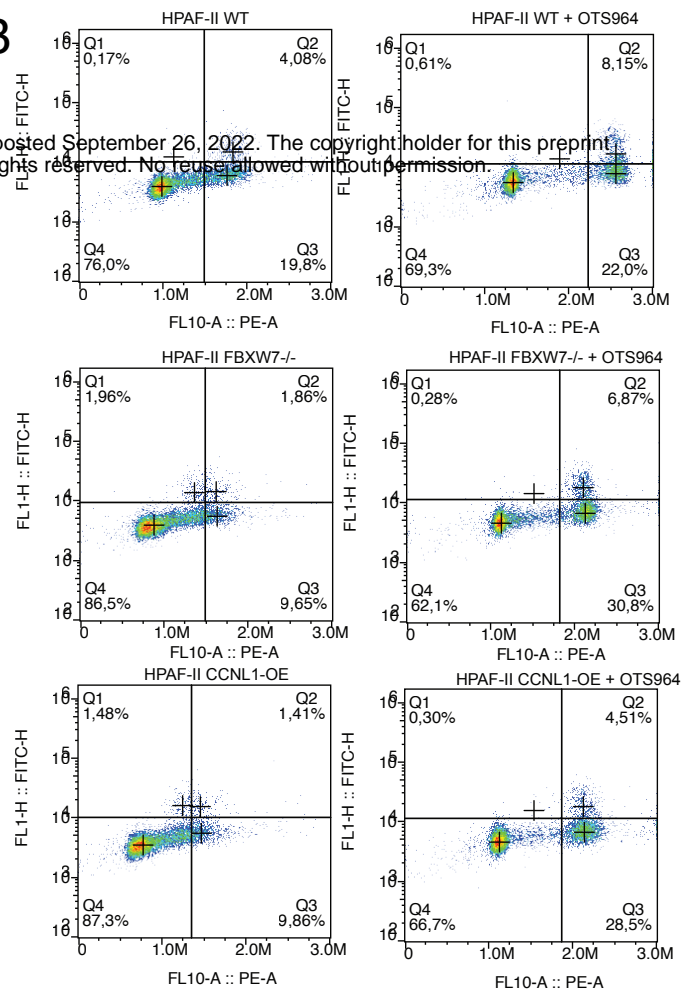

C

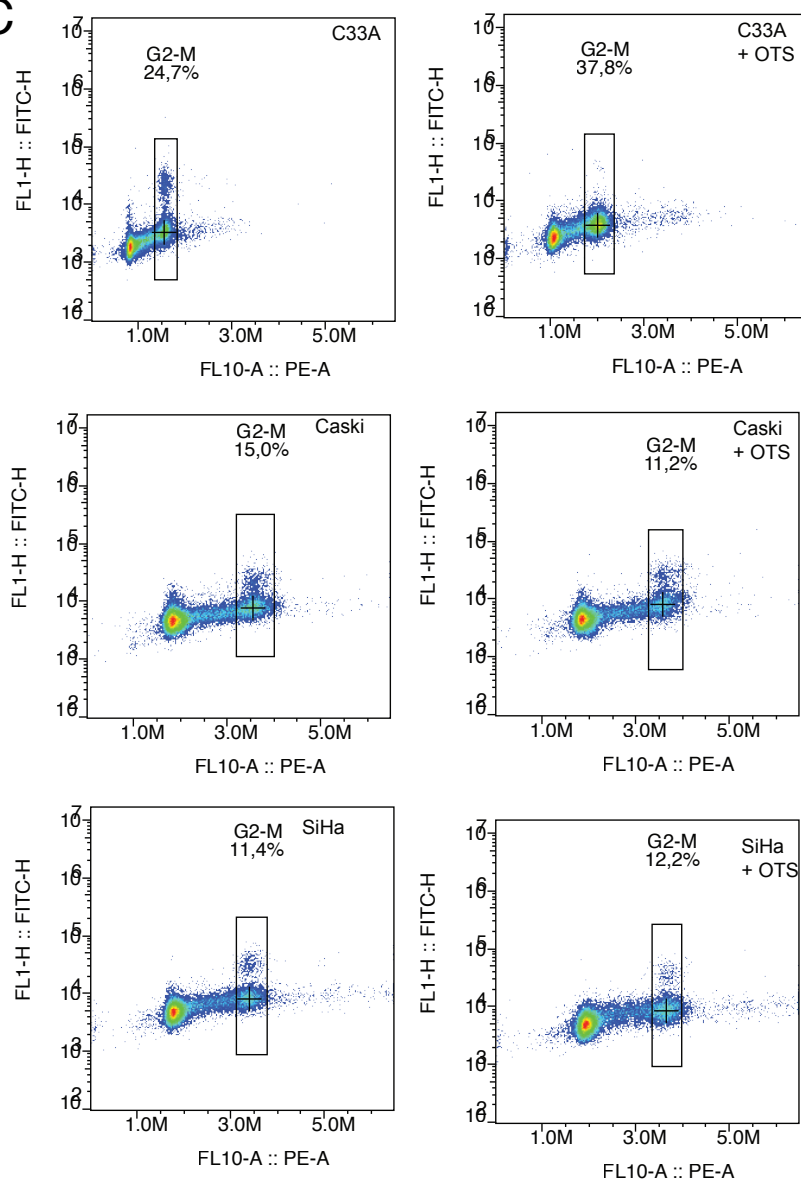

D

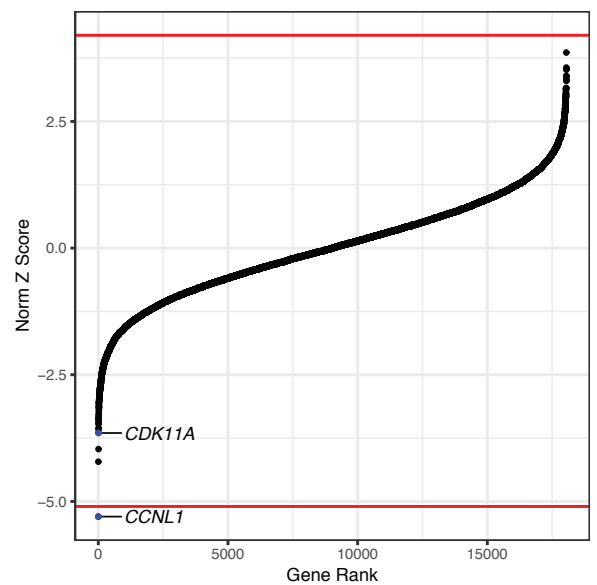

## Wild-type cells

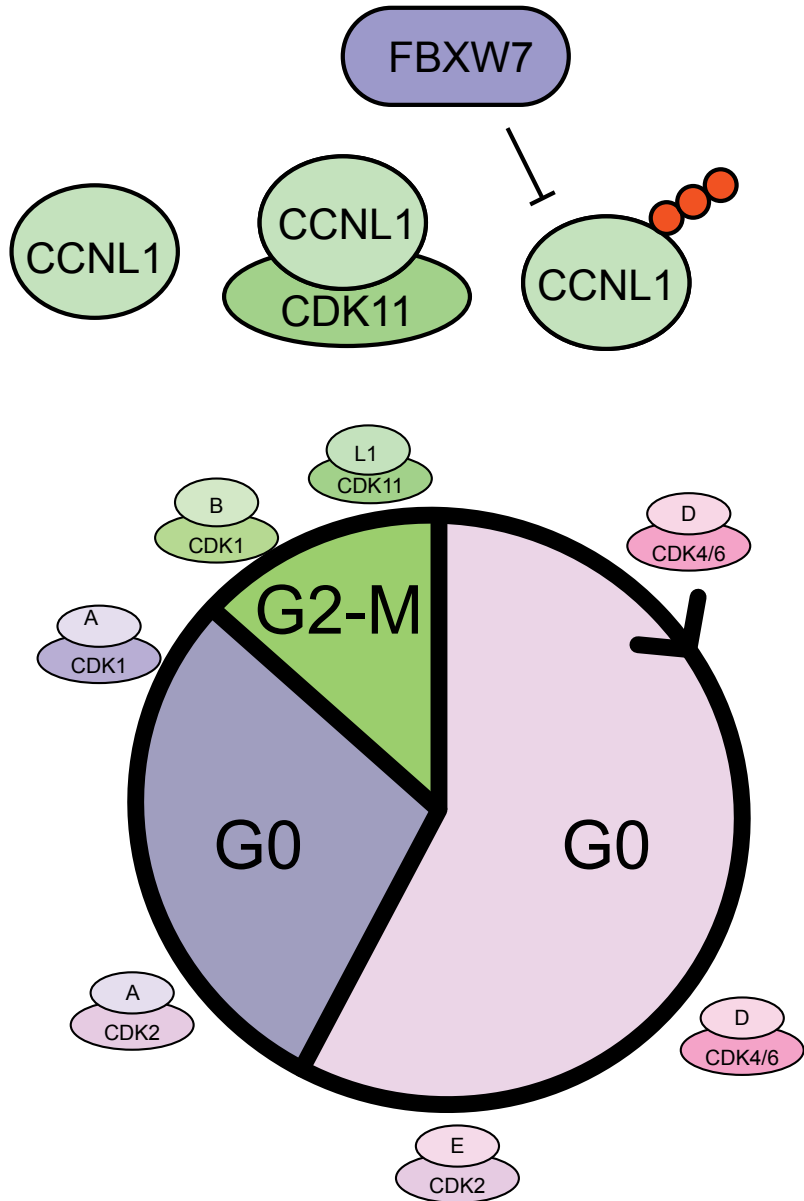

CCNL1 expression restricted to G2-M through degradation by FBXW7

## FBXW7-mutation or CCNL1 amplification

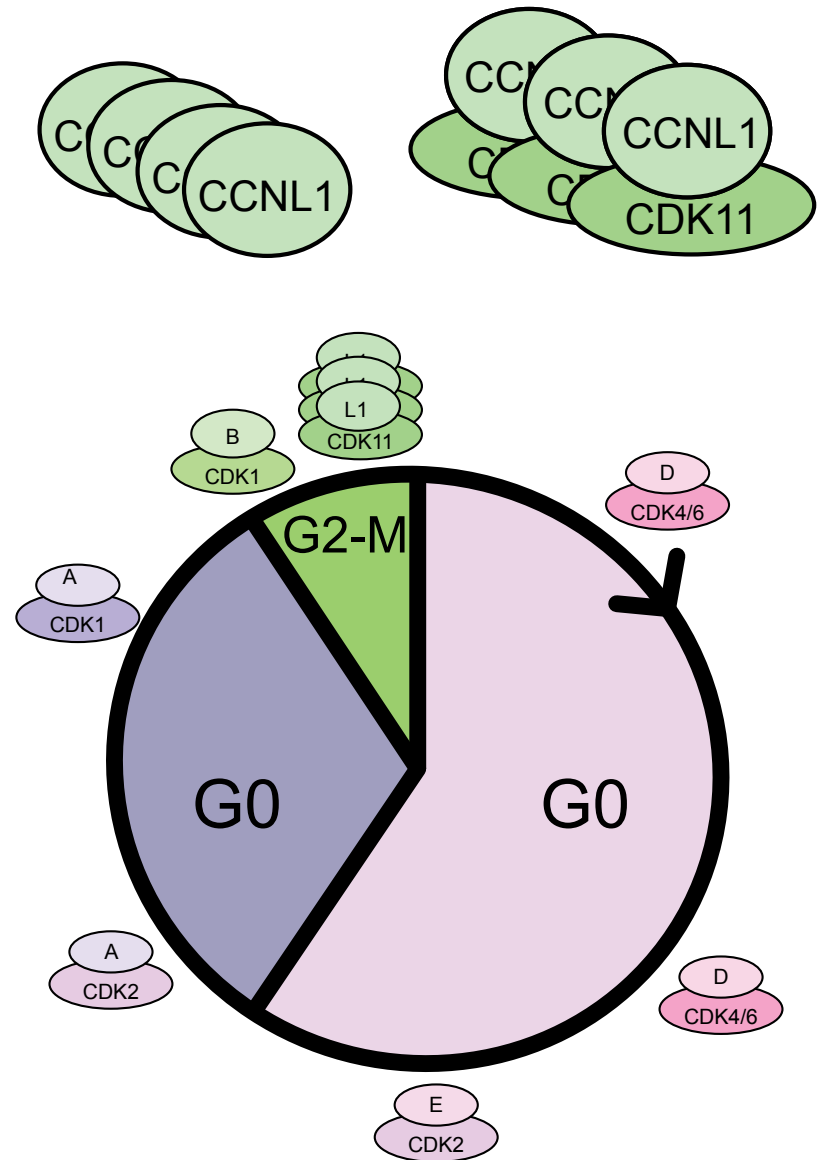

CCNL1 expression is unrestricted, shortening G2-M, and sensitizing cells to CDK11 inhibition
